# Supplementary material for: Comparative Transcriptome and iTRAQ Proteome Analyses Reveal the Mechanisms of Diapause in Aphidius gifuensis Ashmead (Hymenoptera: Aphidiidae)
Source: Front Physiol. 2018 Nov 30;9:1697. doi: 10.3389/fphys.2018.01697 (PMC6284037; doi:10.3389/fphys.2018.01697)
Supplement: Table S4 — KEGG enrichment of differentially expressed genes. [file Table_4.xls]

## Sheet: group2_VS_group1_GO_enrichment
TYPE	GO_ID	GO_term	diff_gene_in_this_GO	UP_GENE	DOWN_GENE	all_diff_gene_in_all_GO	all_gene_in_this_GO	all_gene_in_all_GO	gene_UP_list	gene_DOWN_list	Pvalue	FDR
molecular_function	GO:0042302	structural constituent of cuticle	18	16	2	152	59	11360	jiechu1_no_rRNA.1_(paired)_contig_643,jiechu1_no_rRNA.1_(paired)_contig_6428,jiechu1_no_rRNA.1_(paired)_contig_9843,jiechu1_no_rRNA.1_(paired)_contig_1060,jiechu1_no_rRNA.1_(paired)_contig_1094,jiechu1_no_rRNA.1_(paired)_contig_3777,jiechu1_no_rRNA.1_(paired)_contig_15635,jiechu1_no_rRNA.1_(paired)_contig_3789,jiechu1_no_rRNA.1_(paired)_contig_8161,jiechu1_no_rRNA.1_(paired)_contig_1657,jiechu1_n…	jiechu1_no_rRNA.1_(paired)_contig_11458,jiechu1_no_rRNA.1_(paired)_contig_9956,	1.25301e-18	2.14265e-16
biological_process	GO:0006030	chitin metabolic process	13	12	1	152	62	11360	jiechu1_no_rRNA.1_(paired)_contig_4386,jiechu1_no_rRNA.1_(paired)_contig_6247,jiechu1_no_rRNA.1_(paired)_contig_363,jiechu1_no_rRNA.1_(paired)_contig_15572,jiechu1_no_rRNA.1_(paired)_contig_1724,jiechu1_no_rRNA.1_(paired)_contig_7304,jiechu1_no_rRNA.1_(paired)_contig_2619,jiechu1_no_rRNA.1_(paired)_contig_2360,jiechu1_no_rRNA.1_(paired)_contig_6982,jiechu1_no_rRNA.1_(paired)_contig_8219,jiechu1_n…	jiechu1_no_rRNA.1_(paired)_contig_136,	3.12286e-12	2.67005e-10
molecular_function	GO:0008061	chitin binding	13	12	1	152	62	11360	jiechu1_no_rRNA.1_(paired)_contig_4386,jiechu1_no_rRNA.1_(paired)_contig_6247,jiechu1_no_rRNA.1_(paired)_contig_363,jiechu1_no_rRNA.1_(paired)_contig_15572,jiechu1_no_rRNA.1_(paired)_contig_1724,jiechu1_no_rRNA.1_(paired)_contig_7304,jiechu1_no_rRNA.1_(paired)_contig_2619,jiechu1_no_rRNA.1_(paired)_contig_2360,jiechu1_no_rRNA.1_(paired)_contig_6982,jiechu1_no_rRNA.1_(paired)_contig_8219,jiechu1_n…	jiechu1_no_rRNA.1_(paired)_contig_136,	3.12286e-12	2.67005e-10
cellular_component	GO:0005576	extracellular region	16	12	4	152	191	11360	jiechu1_no_rRNA.1_(paired)_contig_4386,jiechu1_no_rRNA.1_(paired)_contig_6247,jiechu1_no_rRNA.1_(paired)_contig_363,jiechu1_no_rRNA.1_(paired)_contig_15572,jiechu1_no_rRNA.1_(paired)_contig_1724,jiechu1_no_rRNA.1_(paired)_contig_7304,jiechu1_no_rRNA.1_(paired)_contig_2619,jiechu1_no_rRNA.1_(paired)_contig_2360,jiechu1_no_rRNA.1_(paired)_contig_6982,jiechu1_no_rRNA.1_(paired)_contig_8219,jiechu1_n…	jiechu1_no_rRNA.1_(paired)_contig_136,jiechu1_no_rRNA.1_(paired)_contig_29743,jiechu1_no_rRNA.1_(paired)_contig_10180,jiechu1_no_rRNA.1_(paired)_contig_26695,	7.59167e-09	3.24544e-07
molecular_function	GO:0004553	hydrolase activity, hydrolyzing O-glycosyl compounds	8	6	2	152	84	11360	jiechu1_no_rRNA.1_(paired)_contig_5335,jiechu1_no_rRNA.1_(paired)_contig_363,jiechu1_no_rRNA.1_(paired)_contig_15572,jiechu1_no_rRNA.1_(paired)_contig_263,jiechu1_no_rRNA.1_(paired)_contig_8219,jiechu1_no_rRNA.1_(paired)_contig_5495,	jiechu1_no_rRNA.1_(paired)_contig_10741,jiechu1_no_rRNA.1_(paired)_contig_4323,	8.6414e-06	0.000295536
molecular_function	GO:0031409	pigment binding	3	1	2	152	8	11360	jiechu1_no_rRNA.1_(paired)_contig_234,	jiechu1_no_rRNA.1_(paired)_contig_26695,jiechu1_no_rRNA.1_(paired)_contig_22121,	2.7642e-05	0.000787798
cellular_component	GO:0005615	extracellular space	5	4	1	152	43	11360	jiechu1_no_rRNA.1_(paired)_contig_296,jiechu1_no_rRNA.1_(paired)_contig_48,First_Contig29,jiechu1_no_rRNA.1_(paired)_contig_29,	jiechu1_no_rRNA.1_(paired)_contig_4507,	9.1067e-05	0.00222464
biological_process	GO:0006950	response to stress	5	5	0	152	47	11360	First_Contig1,jiechu1_no_rRNA.1_(paired)_contig_318,jiechu1_no_rRNA.1_(paired)_contig_410,jiechu1_no_rRNA.1_(paired)_contig_13,jiechu1_no_rRNA.1_(paired)_contig_90,	-	0.000142925	0.00305502
molecular_function	GO:0051082	unfolded protein binding	5	5	0	152	51	11360	jiechu1_no_rRNA.1_(paired)_contig_569,jiechu1_no_rRNA.1_(paired)_contig_1209,jiechu1_no_rRNA.1_(paired)_contig_36,jiechu1_no_rRNA.1_(paired)_contig_410,jiechu1_no_rRNA.1_(paired)_contig_90,	-	0.000215983	0.00410368
molecular_function	GO:0004252	serine-type endopeptidase activity	10	5	5	152	202	11360	jiechu1_no_rRNA.1_(paired)_contig_2463,jiechu1_no_rRNA.1_(paired)_contig_101,First_Contig48,jiechu1_no_rRNA.1_(paired)_contig_4492,jiechu1_no_rRNA.1_(paired)_contig_4033,	jiechu1_no_rRNA.1_(paired)_contig_2220,jiechu1_no_rRNA.1_(paired)_contig_28375,jiechu1_no_rRNA.1_(paired)_contig_7383,jiechu1_no_rRNA.1_(paired)_contig_24660,jiechu1_no_rRNA.1_(paired)_contig_21562,	0.000293566	0.00501998
biological_process	GO:0005975	carbohydrate metabolic process	9	7	2	152	177	11360	jiechu1_no_rRNA.1_(paired)_contig_5335,jiechu1_no_rRNA.1_(paired)_contig_363,jiechu1_no_rRNA.1_(paired)_contig_15572,jiechu1_no_rRNA.1_(paired)_contig_263,jiechu1_no_rRNA.1_(paired)_contig_8219,jiechu1_no_rRNA.1_(paired)_contig_243,jiechu1_no_rRNA.1_(paired)_contig_5495,	jiechu1_no_rRNA.1_(paired)_contig_10741,jiechu1_no_rRNA.1_(paired)_contig_4323,	0.000437745	0.00680494
biological_process	GO:0006596	polyamine biosynthetic process	2	0	2	152	7	11360	-	jiechu1_no_rRNA.1_(paired)_contig_4292,jiechu1_no_rRNA.1_(paired)_contig_9557,	0.000515342	0.00734363
cellular_component	GO:0016020	membrane	5	4	1	152	1360	11360	jiechu1_no_rRNA.1_(paired)_contig_3627,jiechu1_no_rRNA.1_(paired)_contig_599,jiechu1_no_rRNA.1_(paired)_contig_2746,jiechu1_no_rRNA.1_(paired)_contig_18407,	jiechu1_no_rRNA.1_(paired)_contig_41476,	0.000591545	0.00778109
cellular_component	GO:0016021	integral component of membrane	6	6	0	152	1463	11360	jiechu1_no_rRNA.1_(paired)_contig_1006,jiechu1_no_rRNA.1_(paired)_contig_1143,jiechu1_no_rRNA.1_(paired)_contig_777,jiechu1_no_rRNA.1_(paired)_contig_3627,jiechu1_no_rRNA.1_(paired)_contig_11486,jiechu1_no_rRNA.1_(paired)_contig_599,	-	0.000730163	0.00891842
molecular_function	GO:0003676	nucleic acid binding	5	3	2	152	1326	11360	jiechu1_no_rRNA.1_(paired)_contig_188,jiechu1_no_rRNA.1_(paired)_contig_15326,jiechu1_no_rRNA.1_(paired)_contig_34352,	jiechu1_no_rRNA.1_(paired)_contig_2754,jiechu1_no_rRNA.1_(paired)_contig_3245,	0.000826014	0.00941656
molecular_function	GO:0004648	O-phospho-L-serine:2-oxoglutarate aminotransferase activity	1	0	1	152	1	11360	-	jiechu1_no_rRNA.1_(paired)_contig_7150,	0.00103681	0.0110809
molecular_function	GO:0004565	beta-galactosidase activity	1	1	0	152	1	11360	jiechu1_no_rRNA.1_(paired)_contig_5495,	-	0.00103681	0.0118196
molecular_function	GO:0003724	RNA helicase activity	1	0	1	152	1	11360	-	jiechu1_no_rRNA.1_(paired)_contig_10,	0.00103681	0.0118196
biological_process	GO:0006457	protein folding	6	6	0	152	101	11360	jiechu1_no_rRNA.1_(paired)_contig_569,jiechu1_no_rRNA.1_(paired)_contig_1209,jiechu1_no_rRNA.1_(paired)_contig_36,jiechu1_no_rRNA.1_(paired)_contig_10875,jiechu1_no_rRNA.1_(paired)_contig_410,jiechu1_no_rRNA.1_(paired)_contig_90,	-	0.00122066	0.0109859
molecular_function	GO:0004084	branched-chain-amino-acid transaminase activity	1	0	1	152	2	11360	-	jiechu1_no_rRNA.1_(paired)_contig_2495,	0.00205538	0.0175735
biological_process	GO:0009081	branched-chain amino acid metabolic process	1	0	1	152	2	11360	-	jiechu1_no_rRNA.1_(paired)_contig_2495,	0.00205538	0.0206747
biological_process	GO:0055114	oxidation-reduction process	21	15	6	152	771	11360	jiechu1_no_rRNA.1_(paired)_contig_1167,jiechu1_no_rRNA.1_(paired)_contig_444,jiechu1_no_rRNA.1_(paired)_contig_1006,jiechu1_no_rRNA.1_(paired)_contig_1143,jiechu1_no_rRNA.1_(paired)_contig_417,jiechu1_no_rRNA.1_(paired)_contig_305,jiechu1_no_rRNA.1_(paired)_contig_16,jiechu1_no_rRNA.1_(paired)_contig_599,jiechu1_no_rRNA.1_(paired)_contig_5409,jiechu1_no_rRNA.1_(paired)_contig_5170,jiechu1_no_rRNA…	jiechu1_no_rRNA.1_(paired)_contig_2065,jiechu1_no_rRNA.1_(paired)_contig_41476,jiechu1_no_rRNA.1_(paired)_contig_21768,jiechu1_no_rRNA.1_(paired)_contig_1493,jiechu1_no_rRNA.1_(paired)_contig_226,jiechu1_no_rRNA.1_(paired)_contig_14799,	0.00228726	0.0177783
molecular_function	GO:0080019	fatty-acyl-CoA reductase (alcohol-forming) activity	3	3	0	152	31	11360	jiechu1_no_rRNA.1_(paired)_contig_2709,jiechu1_no_rRNA.1_(paired)_contig_9839,First_Contig7,	-	0.00229517	0.0170641
biological_process	GO:0006633	fatty acid biosynthetic process	4	4	0	152	55	11360	jiechu1_no_rRNA.1_(paired)_contig_1006,jiechu1_no_rRNA.1_(paired)_contig_1143,jiechu1_no_rRNA.1_(paired)_contig_3627,jiechu1_no_rRNA.1_(paired)_contig_599,	-	0.00239829	0.0170878
molecular_function	GO:0004887	thyroid hormone receptor activity	2	2	0	152	14	11360	jiechu1_no_rRNA.1_(paired)_contig_978,jiechu1_no_rRNA.1_(paired)_contig_2988,	-	0.00272504	0.0186393
biological_process	GO:0006541	glutamine metabolic process	1	1	0	152	3	11360	jiechu1_no_rRNA.1_(paired)_contig_168,	-	0.00339554	0.0223322
molecular_function	GO:0004449	isocitrate dehydrogenase (NAD+) activity	1	1	0	152	3	11360	jiechu1_no_rRNA.1_(paired)_contig_2150,	-	0.00339554	0.0263926
biological_process	GO:0042246	tissue regeneration	1	1	0	152	3	11360	jiechu1_no_rRNA.1_(paired)_contig_11486,	-	0.00339554	0.0263926
molecular_function	GO:0005507	copper ion binding	3	1	2	152	35	11360	jiechu1_no_rRNA.1_(paired)_contig_16,	jiechu1_no_rRNA.1_(paired)_contig_226,jiechu1_no_rRNA.1_(paired)_contig_14799,	0.0034577	0.0203885
biological_process	GO:0030522	intracellular receptor signaling pathway	2	2	0	152	16	11360	jiechu1_no_rRNA.1_(paired)_contig_978,jiechu1_no_rRNA.1_(paired)_contig_2988,	-	0.00380741	0.0217022
molecular_function	GO:0008483	transaminase activity	2	0	2	152	16	11360	-	jiechu1_no_rRNA.1_(paired)_contig_2495,jiechu1_no_rRNA.1_(paired)_contig_7150,	0.00380741	0.0271278
biological_process	GO:0006165	nucleoside diphosphate phosphorylation	1	0	1	152	4	11360	-	jiechu1_no_rRNA.1_(paired)_contig_1779,	0.00504863	0.0269786
molecular_function	GO:0004550	nucleoside diphosphate kinase activity	1	0	1	152	4	11360	-	jiechu1_no_rRNA.1_(paired)_contig_1779,	0.00504863	0.0345326
biological_process	GO:0006228	UTP biosynthetic process	1	0	1	152	4	11360	-	jiechu1_no_rRNA.1_(paired)_contig_1779,	0.00504863	0.0345326
biological_process	GO:0006183	GTP biosynthetic process	1	0	1	152	4	11360	-	jiechu1_no_rRNA.1_(paired)_contig_1779,	0.00504863	0.0345326
molecular_function	GO:0004850	uridine phosphorylase activity	1	0	1	152	4	11360	-	jiechu1_no_rRNA.1_(paired)_contig_2851,	0.00504863	0.0345326
molecular_function	GO:0000981	sequence-specific DNA binding RNA polymerase II transcription factor activity	1	1	0	152	4	11360	jiechu1_no_rRNA.1_(paired)_contig_4976,	-	0.00504863	0.0345326
biological_process	GO:0006241	CTP biosynthetic process	1	0	1	152	4	11360	-	jiechu1_no_rRNA.1_(paired)_contig_1779,	0.00504863	0.0345326
molecular_function	GO:0004180	carboxypeptidase activity	2	2	0	152	19	11360	jiechu1_no_rRNA.1_(paired)_contig_1764,jiechu1_no_rRNA.1_(paired)_contig_615,	-	0.00587503	0.0257598
molecular_function	GO:0051015	actin filament binding	1	1	0	152	5	11360	jiechu1_no_rRNA.1_(paired)_contig_31534,	-	0.00700614	0.0299513
molecular_function	GO:0051087	chaperone binding	1	1	0	152	5	11360	jiechu1_no_rRNA.1_(paired)_contig_848,	-	0.00700614	0.0443722
molecular_function	GO:0008241	peptidyl-dipeptidase activity	1	1	0	152	5	11360	jiechu1_no_rRNA.1_(paired)_contig_18407,	-	0.00700614	0.0443722
biological_process	GO:0006564	L-serine biosynthetic process	1	0	1	152	5	11360	-	jiechu1_no_rRNA.1_(paired)_contig_7150,	0.00700614	0.0443722
molecular_function	GO:0004869	cysteine-type endopeptidase inhibitor activity	1	0	1	152	5	11360	-	jiechu1_no_rRNA.1_(paired)_contig_7455,	0.00700614	0.0443722
biological_process	GO:0006810	transport	1	1	0	152	582	11360	jiechu1_no_rRNA.1_(paired)_contig_3349,	-	0.00750061	0.0285023
molecular_function	GO:0016717	oxidoreductase activity, acting on paired donors, with oxidation of a pair of donors resulting in the reduction of molecular oxygen to two molecules of water	2	2	0	152	21	11360	jiechu1_no_rRNA.1_(paired)_contig_1006,jiechu1_no_rRNA.1_(paired)_contig_1143,	-	0.00757131	0.0281455
biological_process	GO:0006508	proteolysis	17	11	6	152	645	11360	jiechu1_no_rRNA.1_(paired)_contig_2463,jiechu1_no_rRNA.1_(paired)_contig_101,First_Contig48,jiechu1_no_rRNA.1_(paired)_contig_837,jiechu1_no_rRNA.1_(paired)_contig_1764,jiechu1_no_rRNA.1_(paired)_contig_4492,jiechu1_no_rRNA.1_(paired)_contig_4033,jiechu1_no_rRNA.1_(paired)_contig_615,jiechu1_no_rRNA.1_(paired)_contig_333,jiechu1_no_rRNA.1_(paired)_contig_168,jiechu1_no_rRNA.1_(paired)_contig_1840…	jiechu1_no_rRNA.1_(paired)_contig_2220,jiechu1_no_rRNA.1_(paired)_contig_7455,jiechu1_no_rRNA.1_(paired)_contig_28375,jiechu1_no_rRNA.1_(paired)_contig_7383,jiechu1_no_rRNA.1_(paired)_contig_24660,jiechu1_no_rRNA.1_(paired)_contig_21562,	0.00759136	0.0276196
biological_process	GO:0006744	ubiquinone biosynthetic process	1	1	0	152	6	11360	jiechu1_no_rRNA.1_(paired)_contig_4104,	-	0.00925975	0.0329879
cellular_component	GO:0043234	protein complex	2	2	0	152	25	11360	jiechu1_no_rRNA.1_(paired)_contig_2638,jiechu1_no_rRNA.1_(paired)_contig_1648,	-	0.0117837	0.0411228
molecular_function	GO:0004181	metallocarboxypeptidase activity	2	2	0	152	25	11360	jiechu1_no_rRNA.1_(paired)_contig_1764,jiechu1_no_rRNA.1_(paired)_contig_615,	-	0.0117837	0.0629693
biological_process	GO:0051258	protein polymerization	2	2	0	152	25	11360	jiechu1_no_rRNA.1_(paired)_contig_2638,jiechu1_no_rRNA.1_(paired)_contig_1648,	-	0.0117837	0.0629693
biological_process	GO:0019430	removal of superoxide radicals	1	1	0	152	7	11360	jiechu1_no_rRNA.1_(paired)_contig_305,	-	0.0118013	0.0388081
molecular_function	GO:0004784	superoxide dismutase activity	1	1	0	152	7	11360	jiechu1_no_rRNA.1_(paired)_contig_305,	-	0.0118013	0.0611522
molecular_function	GO:0030247	polysaccharide binding	1	1	0	152	7	11360	jiechu1_no_rRNA.1_(paired)_contig_2746,	-	0.0118013	0.0611522
molecular_function	GO:0003824	catalytic activity	20	9	11	152	841	11360	jiechu1_no_rRNA.1_(paired)_contig_5335,jiechu1_no_rRNA.1_(paired)_contig_2463,jiechu1_no_rRNA.1_(paired)_contig_101,First_Contig48,jiechu1_no_rRNA.1_(paired)_contig_4492,jiechu1_no_rRNA.1_(paired)_contig_4033,jiechu1_no_rRNA.1_(paired)_contig_263,jiechu1_no_rRNA.1_(paired)_contig_168,jiechu1_no_rRNA.1_(paired)_contig_243,	jiechu1_no_rRNA.1_(paired)_contig_2495,jiechu1_no_rRNA.1_(paired)_contig_4292,jiechu1_no_rRNA.1_(paired)_contig_10,jiechu1_no_rRNA.1_(paired)_contig_2220,jiechu1_no_rRNA.1_(paired)_contig_7150,jiechu1_no_rRNA.1_(paired)_contig_9557,jiechu1_no_rRNA.1_(paired)_contig_28375,jiechu1_no_rRNA.1_(paired)_contig_2851,jiechu1_no_rRNA.1_(paired)_contig_7383,jiechu1_no_rRNA.1_(paired)_contig_24660,jiechu1_n…	0.0127583	0.0396668
molecular_function	GO:0005200	structural constituent of cytoskeleton	2	2	0	152	27	11360	jiechu1_no_rRNA.1_(paired)_contig_2638,jiechu1_no_rRNA.1_(paired)_contig_1648,	-	0.014321	0.0437301
molecular_function	GO:0003840	gamma-glutamyltransferase activity	1	1	0	152	10	11360	jiechu1_no_rRNA.1_(paired)_contig_1819,	-	0.0210744	0.0632232
biological_process	GO:0007010	cytoskeleton organization	1	1	0	152	10	11360	jiechu1_no_rRNA.1_(paired)_contig_138,	-	0.0210744	0.100103
biological_process	GO:0006955	immune response	1	1	0	152	10	11360	jiechu1_no_rRNA.1_(paired)_contig_2746,	-	0.0210744	0.100103
biological_process	GO:0006749	glutathione metabolic process	1	1	0	152	10	11360	jiechu1_no_rRNA.1_(paired)_contig_1819,	-	0.0210744	0.100103
molecular_function	GO:0030234	enzyme regulator activity	1	0	1	152	10	11360	-	jiechu1_no_rRNA.1_(paired)_contig_26992,	0.0210744	0.100103
molecular_function	GO:0000166	nucleotide binding	10	8	2	152	1495	11360	jiechu1_no_rRNA.1_(paired)_contig_2638,jiechu1_no_rRNA.1_(paired)_contig_569,jiechu1_no_rRNA.1_(paired)_contig_1648,jiechu1_no_rRNA.1_(paired)_contig_188,First_Contig1,jiechu1_no_rRNA.1_(paired)_contig_318,jiechu1_no_rRNA.1_(paired)_contig_15326,jiechu1_no_rRNA.1_(paired)_contig_13,	jiechu1_no_rRNA.1_(paired)_contig_15624,jiechu1_no_rRNA.1_(paired)_contig_1779,	0.0222063	0.0612465
biological_process	GO:0006099	tricarboxylic acid cycle	2	2	0	152	33	11360	jiechu1_no_rRNA.1_(paired)_contig_1167,jiechu1_no_rRNA.1_(paired)_contig_2150,	-	0.0237542	0.0644757
biological_process	GO:0007017	microtubule-based process	2	2	0	152	33	11360	jiechu1_no_rRNA.1_(paired)_contig_2638,jiechu1_no_rRNA.1_(paired)_contig_1648,	-	0.0237542	0.106894
molecular_function	GO:0004559	alpha-mannosidase activity	1	1	0	152	11	11360	jiechu1_no_rRNA.1_(paired)_contig_5335,	-	0.0246893	0.064952
biological_process	GO:0022900	electron transport chain	1	1	0	152	11	11360	jiechu1_no_rRNA.1_(paired)_contig_1167,	-	0.0246893	0.108253
biological_process	GO:0039694	viral RNA genome replication	1	0	1	152	11	11360	-	jiechu1_no_rRNA.1_(paired)_contig_10,	0.0246893	0.108253
molecular_function	GO:0016651	oxidoreductase activity, acting on NAD(P)H	1	0	1	152	11	11360	-	jiechu1_no_rRNA.1_(paired)_contig_41476,	0.0246893	0.108253
molecular_function	GO:0016798	hydrolase activity, acting on glycosyl bonds	2	2	0	152	34	11360	jiechu1_no_rRNA.1_(paired)_contig_363,jiechu1_no_rRNA.1_(paired)_contig_5495,	-	0.0256	0.0634435
molecular_function	GO:0004601	peroxidase activity	2	2	0	152	34	11360	jiechu1_no_rRNA.1_(paired)_contig_417,jiechu1_no_rRNA.1_(paired)_contig_5409,	-	0.0256	0.10944
biological_process	GO:0006801	superoxide metabolic process	1	1	0	152	12	11360	jiechu1_no_rRNA.1_(paired)_contig_305,	-	0.0285538	0.0687704
biological_process	GO:0006013	mannose metabolic process	1	1	0	152	12	11360	jiechu1_no_rRNA.1_(paired)_contig_5335,	-	0.0285538	0.11909
molecular_function	GO:0015923	mannosidase activity	1	1	0	152	12	11360	jiechu1_no_rRNA.1_(paired)_contig_5335,	-	0.0285538	0.11909
biological_process	GO:0006979	response to oxidative stress	2	2	0	152	37	11360	jiechu1_no_rRNA.1_(paired)_contig_417,jiechu1_no_rRNA.1_(paired)_contig_5409,	-	0.0316173	0.0730617
molecular_function	GO:0003968	RNA-directed RNA polymerase activity	1	0	1	152	13	11360	-	jiechu1_no_rRNA.1_(paired)_contig_10,	0.0326606	0.0744662
biological_process	GO:0006032	chitin catabolic process	1	1	0	152	13	11360	jiechu1_no_rRNA.1_(paired)_contig_363,	-	0.0326606	0.129883
molecular_function	GO:0004568	chitinase activity	1	1	0	152	13	11360	jiechu1_no_rRNA.1_(paired)_contig_363,	-	0.0326606	0.129883
biological_process	GO:0001172	transcription, RNA-templated	1	0	1	152	13	11360	-	jiechu1_no_rRNA.1_(paired)_contig_10,	0.0326606	0.129883
molecular_function	GO:0016491	oxidoreductase activity	13	9	4	152	538	11360	jiechu1_no_rRNA.1_(paired)_contig_1167,jiechu1_no_rRNA.1_(paired)_contig_1006,jiechu1_no_rRNA.1_(paired)_contig_1143,jiechu1_no_rRNA.1_(paired)_contig_305,jiechu1_no_rRNA.1_(paired)_contig_16,jiechu1_no_rRNA.1_(paired)_contig_599,jiechu1_no_rRNA.1_(paired)_contig_5170,jiechu1_no_rRNA.1_(paired)_contig_2150,jiechu1_no_rRNA.1_(paired)_contig_8047,	jiechu1_no_rRNA.1_(paired)_contig_2065,jiechu1_no_rRNA.1_(paired)_contig_1493,jiechu1_no_rRNA.1_(paired)_contig_226,jiechu1_no_rRNA.1_(paired)_contig_14799,	0.0335205	0.0725571
molecular_function	GO:0003707	steroid hormone receptor activity	2	2	0	152	39	11360	jiechu1_no_rRNA.1_(paired)_contig_978,jiechu1_no_rRNA.1_(paired)_contig_2988,	-	0.0360323	0.077019
biological_process	GO:0043401	steroid hormone mediated signaling pathway	2	2	0	152	39	11360	jiechu1_no_rRNA.1_(paired)_contig_978,jiechu1_no_rRNA.1_(paired)_contig_2988,	-	0.0360323	0.136923
biological_process	GO:0009166	nucleotide catabolic process	1	0	1	152	14	11360	-	jiechu1_no_rRNA.1_(paired)_contig_2851,	0.0370026	0.077164
molecular_function	GO:0005044	scavenger receptor activity	1	1	0	152	14	11360	jiechu1_no_rRNA.1_(paired)_contig_2746,	-	0.0370026	0.137553
molecular_function	GO:0008242	omega peptidase activity	1	1	0	152	14	11360	jiechu1_no_rRNA.1_(paired)_contig_168,	-	0.0370026	0.137553
molecular_function	GO:0005524	ATP binding	10	8	2	152	1410	11360	jiechu1_no_rRNA.1_(paired)_contig_569,jiechu1_no_rRNA.1_(paired)_contig_1209,jiechu1_no_rRNA.1_(paired)_contig_31534,jiechu1_no_rRNA.1_(paired)_contig_36,First_Contig1,jiechu1_no_rRNA.1_(paired)_contig_318,jiechu1_no_rRNA.1_(paired)_contig_13,jiechu1_no_rRNA.1_(paired)_contig_90,	jiechu1_no_rRNA.1_(paired)_contig_15624,jiechu1_no_rRNA.1_(paired)_contig_1779,	0.0401856	0.0808439
molecular_function	GO:0020037	heme binding	5	3	2	152	155	11360	jiechu1_no_rRNA.1_(paired)_contig_444,jiechu1_no_rRNA.1_(paired)_contig_417,jiechu1_no_rRNA.1_(paired)_contig_5409,	jiechu1_no_rRNA.1_(paired)_contig_2065,jiechu1_no_rRNA.1_(paired)_contig_1493,	0.0414468	0.0824117
molecular_function	GO:0030246	carbohydrate binding	3	3	0	152	79	11360	jiechu1_no_rRNA.1_(paired)_contig_5335,jiechu1_no_rRNA.1_(paired)_contig_3043,jiechu1_no_rRNA.1_(paired)_contig_166,	-	0.0490296	0.0963685
molecular_function	GO:0051539	4 iron, 4 sulfur cluster binding	1	0	1	152	18	11360	-	jiechu1_no_rRNA.1_(paired)_contig_41476,	0.0565867	0.109958
biological_process	GO:0006468	protein phosphorylation	1	0	1	152	399	11360	-	jiechu1_no_rRNA.1_(paired)_contig_15624,	0.0616751	0.118499
biological_process	GO:0009116	nucleoside metabolic process	1	0	1	152	19	11360	-	jiechu1_no_rRNA.1_(paired)_contig_2851,	0.0620039	0.117807
biological_process	GO:0006898	receptor-mediated endocytosis	1	1	0	152	19	11360	jiechu1_no_rRNA.1_(paired)_contig_2746,	-	0.0620039	0.203897
molecular_function	GO:0004672	protein kinase activity	1	0	1	152	389	11360	-	jiechu1_no_rRNA.1_(paired)_contig_15624,	0.0689617	0.128179
molecular_function	GO:0008236	serine-type peptidase activity	4	1	3	152	131	11360	jiechu1_no_rRNA.1_(paired)_contig_2463,	jiechu1_no_rRNA.1_(paired)_contig_2220,jiechu1_no_rRNA.1_(paired)_contig_24660,jiechu1_no_rRNA.1_(paired)_contig_21562,	0.0700892	0.128874
molecular_function	GO:0003677	DNA binding	4	3	1	152	715	11360	jiechu1_no_rRNA.1_(paired)_contig_978,jiechu1_no_rRNA.1_(paired)_contig_472,jiechu1_no_rRNA.1_(paired)_contig_2988,	jiechu1_no_rRNA.1_(paired)_contig_6514,	0.0783534	0.142536
biological_process	GO:0007165	signal transduction	1	1	0	152	374	11360	jiechu1_no_rRNA.1_(paired)_contig_29,	-	0.0814662	0.146639
biological_process	GO:0016310	phosphorylation	2	0	2	152	489	11360	-	jiechu1_no_rRNA.1_(paired)_contig_15624,jiechu1_no_rRNA.1_(paired)_contig_1779,	0.084427	0.150386
biological_process	GO:0010466	negative regulation of peptidase activity	1	0	1	152	23	11360	-	jiechu1_no_rRNA.1_(paired)_contig_3897,	0.0855694	0.150849
molecular_function	GO:0030414	peptidase inhibitor activity	1	0	1	152	23	11360	-	jiechu1_no_rRNA.1_(paired)_contig_3897,	0.0855694	0.252282
biological_process	GO:0006631	fatty acid metabolic process	1	1	0	152	23	11360	jiechu1_no_rRNA.1_(paired)_contig_3627,	-	0.0855694	0.252282
molecular_function	GO:0008237	metallopeptidase activity	4	4	0	152	139	11360	jiechu1_no_rRNA.1_(paired)_contig_837,jiechu1_no_rRNA.1_(paired)_contig_1764,jiechu1_no_rRNA.1_(paired)_contig_333,jiechu1_no_rRNA.1_(paired)_contig_18407,	-	0.0861108	0.14725
molecular_function	GO:0016627	oxidoreductase activity, acting on the CH-CH group of donors	1	1	0	152	24	11360	jiechu1_no_rRNA.1_(paired)_contig_1167,	-	0.0919054	0.155602
biological_process	GO:0008152	metabolic process	15	9	6	152	1727	11360	jiechu1_no_rRNA.1_(paired)_contig_665,jiechu1_no_rRNA.1_(paired)_contig_363,jiechu1_no_rRNA.1_(paired)_contig_31534,jiechu1_no_rRNA.1_(paired)_contig_53,jiechu1_no_rRNA.1_(paired)_contig_5568,jiechu1_no_rRNA.1_(paired)_contig_2587,jiechu1_no_rRNA.1_(paired)_contig_3683,jiechu1_no_rRNA.1_(paired)_contig_196,jiechu1_no_rRNA.1_(paired)_contig_5495,	jiechu1_no_rRNA.1_(paired)_contig_2495,jiechu1_no_rRNA.1_(paired)_contig_30459,jiechu1_no_rRNA.1_(paired)_contig_7150,jiechu1_no_rRNA.1_(paired)_contig_37,jiechu1_no_rRNA.1_(paired)_contig_3964,jiechu1_no_rRNA.1_(paired)_contig_13710,	0.101213	0.16968
molecular_function	GO:0005506	iron ion binding	4	2	2	152	146	11360	jiechu1_no_rRNA.1_(paired)_contig_444,jiechu1_no_rRNA.1_(paired)_contig_599,	jiechu1_no_rRNA.1_(paired)_contig_2065,jiechu1_no_rRNA.1_(paired)_contig_1493,	0.10179	0.168992
molecular_function	GO:0016810	hydrolase activity, acting on carbon-nitrogen (but not peptide) bonds	1	1	0	152	26	11360	jiechu1_no_rRNA.1_(paired)_contig_243,	-	0.105071	0.172761
biological_process	GO:0000413	protein peptidyl-prolyl isomerization	1	1	0	152	26	11360	jiechu1_no_rRNA.1_(paired)_contig_10875,	-	0.105071	0.285193
molecular_function	GO:0003755	peptidyl-prolyl cis-trans isomerase activity	1	1	0	152	26	11360	jiechu1_no_rRNA.1_(paired)_contig_10875,	-	0.105071	0.285193
molecular_function	GO:0016301	kinase activity	2	0	2	152	462	11360	-	jiechu1_no_rRNA.1_(paired)_contig_15624,jiechu1_no_rRNA.1_(paired)_contig_1779,	0.109818	0.175503
molecular_function	GO:0016705	oxidoreductase activity, acting on paired donors, with incorporation or reduction of molecular oxygen	3	1	2	152	104	11360	jiechu1_no_rRNA.1_(paired)_contig_444,	jiechu1_no_rRNA.1_(paired)_contig_2065,jiechu1_no_rRNA.1_(paired)_contig_1493,	0.110966	0.175696
cellular_component	GO:0005634	nucleus	6	5	1	152	872	11360	jiechu1_no_rRNA.1_(paired)_contig_12590,jiechu1_no_rRNA.1_(paired)_contig_978,jiechu1_no_rRNA.1_(paired)_contig_15326,jiechu1_no_rRNA.1_(paired)_contig_2988,jiechu1_no_rRNA.1_(paired)_contig_4976,	jiechu1_no_rRNA.1_(paired)_contig_6514,	0.111524	0.17496
cellular_component	GO:0005622	intracellular	2	2	0	152	454	11360	jiechu1_no_rRNA.1_(paired)_contig_3349,jiechu1_no_rRNA.1_(paired)_contig_3461,	-	0.11861	0.184385
biological_process	GO:0046854	phosphatidylinositol phosphorylation	1	0	1	152	28	11360	-	jiechu1_no_rRNA.1_(paired)_contig_1991,	0.118859	0.183108
molecular_function	GO:0016772	transferase activity, transferring phosphorus-containing groups	2	1	1	152	451	11360	jiechu1_no_rRNA.1_(paired)_contig_3683,	jiechu1_no_rRNA.1_(paired)_contig_15624,	0.122072	0.186378
biological_process	GO:0010951	negative regulation of endopeptidase activity	1	0	1	152	29	11360	-	jiechu1_no_rRNA.1_(paired)_contig_7455,	0.125974	0.190633
molecular_function	GO:0003993	acid phosphatase activity	1	0	1	152	30	11360	-	jiechu1_no_rRNA.1_(paired)_contig_13963,	0.133228	0.199842
biological_process	GO:0006066	alcohol metabolic process	1	0	1	152	32	11360	-	jiechu1_no_rRNA.1_(paired)_contig_21768,	0.148138	0.220274
molecular_function	GO:0008812	choline dehydrogenase activity	1	0	1	152	32	11360	-	jiechu1_no_rRNA.1_(paired)_contig_21768,	0.148138	0.351827
biological_process	GO:0007229	integrin-mediated signaling pathway	1	1	0	152	33	11360	jiechu1_no_rRNA.1_(paired)_contig_333,	-	0.155783	0.227683
molecular_function	GO:0051287	NAD binding	1	1	0	152	36	11360	jiechu1_no_rRNA.1_(paired)_contig_2150,	-	0.179427	0.260017
cellular_component	GO:0005578	proteinaceous extracellular matrix	1	1	0	152	37	11360	jiechu1_no_rRNA.1_(paired)_contig_29,	-	0.18753	0.269476
molecular_function	GO:0016881	acid-amino acid ligase activity	1	1	0	152	39	11360	jiechu1_no_rRNA.1_(paired)_contig_53,	-	0.204041	0.290758
biological_process	GO:0006366	transcription from RNA polymerase II promoter	1	1	0	152	39	11360	jiechu1_no_rRNA.1_(paired)_contig_4976,	-	0.204041	0.459092
biological_process	GO:0006629	lipid metabolic process	3	3	0	152	131	11360	jiechu1_no_rRNA.1_(paired)_contig_1006,jiechu1_no_rRNA.1_(paired)_contig_1143,jiechu1_no_rRNA.1_(paired)_contig_3627,	-	0.209242	0.293281
molecular_function	GO:0016616	oxidoreductase activity, acting on the CH-OH group of donors, NAD or NADP as acceptor	1	1	0	152	41	11360	jiechu1_no_rRNA.1_(paired)_contig_2150,	-	0.220933	0.307151
biological_process	GO:0006396	RNA processing	2	2	0	152	86	11360	jiechu1_no_rRNA.1_(paired)_contig_15326,jiechu1_no_rRNA.1_(paired)_contig_34352,	-	0.227973	0.314382
biological_process	GO:0006351	transcription, DNA-templated	4	2	2	152	188	11360	jiechu1_no_rRNA.1_(paired)_contig_978,jiechu1_no_rRNA.1_(paired)_contig_2988,	jiechu1_no_rRNA.1_(paired)_contig_10,jiechu1_no_rRNA.1_(paired)_contig_6514,	0.228074	0.312005
molecular_function	GO:0016787	hydrolase activity	15	6	9	152	861	11360	jiechu1_no_rRNA.1_(paired)_contig_2463,jiechu1_no_rRNA.1_(paired)_contig_363,jiechu1_no_rRNA.1_(paired)_contig_1764,jiechu1_no_rRNA.1_(paired)_contig_5568,jiechu1_no_rRNA.1_(paired)_contig_168,jiechu1_no_rRNA.1_(paired)_contig_5495,	jiechu1_no_rRNA.1_(paired)_contig_2220,jiechu1_no_rRNA.1_(paired)_contig_30459,jiechu1_no_rRNA.1_(paired)_contig_10741,jiechu1_no_rRNA.1_(paired)_contig_37,jiechu1_no_rRNA.1_(paired)_contig_3964,jiechu1_no_rRNA.1_(paired)_contig_13710,jiechu1_no_rRNA.1_(paired)_contig_4323,jiechu1_no_rRNA.1_(paired)_contig_24660,jiechu1_no_rRNA.1_(paired)_contig_21562,	0.250625	0.340133
molecular_function	GO:0016740	transferase activity	6	2	4	152	751	11360	jiechu1_no_rRNA.1_(paired)_contig_665,jiechu1_no_rRNA.1_(paired)_contig_3627,	jiechu1_no_rRNA.1_(paired)_contig_2495,jiechu1_no_rRNA.1_(paired)_contig_7150,jiechu1_no_rRNA.1_(paired)_contig_15624,jiechu1_no_rRNA.1_(paired)_contig_1779,	0.255894	0.34455
molecular_function	GO:0050660	flavin adenine dinucleotide binding	2	1	1	152	91	11360	jiechu1_no_rRNA.1_(paired)_contig_1167,	jiechu1_no_rRNA.1_(paired)_contig_21768,	0.256847	0.343132
cellular_component	GO:0005874	microtubule	2	2	0	152	91	11360	jiechu1_no_rRNA.1_(paired)_contig_2638,jiechu1_no_rRNA.1_(paired)_contig_1648,	-	0.256847	0.529167
molecular_function	GO:0003964	RNA-directed DNA polymerase activity	1	0	1	152	263	11360	-	jiechu1_no_rRNA.1_(paired)_contig_2754,	0.268497	0.353176
molecular_function	GO:0004674	protein serine/threonine kinase activity	1	0	1	152	262	11360	-	jiechu1_no_rRNA.1_(paired)_contig_15624,	0.271288	0.354124
molecular_function	GO:0016614	oxidoreductase activity, acting on CH-OH group of donors	1	0	1	152	47	11360	-	jiechu1_no_rRNA.1_(paired)_contig_21768,	0.273589	0.354422
biological_process	GO:0006278	RNA-dependent DNA replication	1	0	1	152	260	11360	-	jiechu1_no_rRNA.1_(paired)_contig_2754,	0.276952	0.356081
molecular_function	GO:0008233	peptidase activity	6	3	3	152	316	11360	jiechu1_no_rRNA.1_(paired)_contig_2463,jiechu1_no_rRNA.1_(paired)_contig_101,jiechu1_no_rRNA.1_(paired)_contig_1764,	jiechu1_no_rRNA.1_(paired)_contig_2220,jiechu1_no_rRNA.1_(paired)_contig_24660,jiechu1_no_rRNA.1_(paired)_contig_21562,	0.277367	0.353953
cellular_component	GO:0016459	myosin complex	1	1	0	152	48	11360	jiechu1_no_rRNA.1_(paired)_contig_31534,	-	0.282616	0.35798
molecular_function	GO:0003774	motor activity	1	1	0	152	48	11360	jiechu1_no_rRNA.1_(paired)_contig_31534,	-	0.282616	0.543003
molecular_function	GO:0003723	RNA binding	4	2	2	152	549	11360	jiechu1_no_rRNA.1_(paired)_contig_15326,jiechu1_no_rRNA.1_(paired)_contig_34352,	jiechu1_no_rRNA.1_(paired)_contig_10,jiechu1_no_rRNA.1_(paired)_contig_2754,	0.288832	0.360513
molecular_function	GO:0051536	iron-sulfur cluster binding	1	0	1	152	49	11360	-	jiechu1_no_rRNA.1_(paired)_contig_41476,	0.291705	0.361461
molecular_function	GO:0030170	pyridoxal phosphate binding	1	0	1	152	50	11360	-	jiechu1_no_rRNA.1_(paired)_contig_7150,	0.300854	0.370115
cellular_component	GO:0005856	cytoskeleton	2	2	0	152	99	11360	jiechu1_no_rRNA.1_(paired)_contig_2638,jiechu1_no_rRNA.1_(paired)_contig_1648,	-	0.305516	0.373166
biological_process	GO:0050790	regulation of catalytic activity	1	0	1	152	53	11360	-	jiechu1_no_rRNA.1_(paired)_contig_26992,	0.328625	0.398545
molecular_function	GO:0016758	transferase activity, transferring hexosyl groups	1	1	0	152	54	11360	jiechu1_no_rRNA.1_(paired)_contig_2587,	-	0.337981	0.407005
biological_process	GO:0006357	regulation of transcription from RNA polymerase II promoter	1	1	0	152	56	11360	jiechu1_no_rRNA.1_(paired)_contig_4976,	-	0.356822	0.426689
molecular_function	GO:0004497	monooxygenase activity	2	0	2	152	110	11360	-	jiechu1_no_rRNA.1_(paired)_contig_2065,jiechu1_no_rRNA.1_(paired)_contig_1493,	0.376594	0.447205
molecular_function	GO:0000287	magnesium ion binding	1	1	0	152	60	11360	jiechu1_no_rRNA.1_(paired)_contig_2150,	-	0.394949	0.465767
cellular_component	GO:0005737	cytoplasm	3	2	1	152	413	11360	jiechu1_no_rRNA.1_(paired)_contig_2638,jiechu1_no_rRNA.1_(paired)_contig_1648,	jiechu1_no_rRNA.1_(paired)_contig_2851,	0.398303	0.466505
molecular_function	GO:0016746	transferase activity, transferring acyl groups	1	1	0	152	67	11360	jiechu1_no_rRNA.1_(paired)_contig_665,	-	0.46268	0.538219
molecular_function	GO:0005549	odorant binding	1	0	1	152	67	11360	-	jiechu1_no_rRNA.1_(paired)_contig_11031,	0.46268	0.791182
molecular_function	GO:0004222	metalloendopeptidase activity	2	2	0	152	124	11360	jiechu1_no_rRNA.1_(paired)_contig_837,jiechu1_no_rRNA.1_(paired)_contig_333,	-	0.47222	0.541944
biological_process	GO:0007275	multicellular organismal development	1	1	0	152	73	11360	jiechu1_no_rRNA.1_(paired)_contig_12590,	-	0.521265	0.594243
molecular_function	GO:0005509	calcium ion binding	5	4	1	152	324	11360	jiechu1_no_rRNA.1_(paired)_contig_1185,jiechu1_no_rRNA.1_(paired)_contig_4483,jiechu1_no_rRNA.1_(paired)_contig_29,jiechu1_no_rRNA.1_(paired)_contig_554,	jiechu1_no_rRNA.1_(paired)_contig_26992,	0.544331	0.616428
molecular_function	GO:0005525	GTP binding	2	2	0	152	282	11360	jiechu1_no_rRNA.1_(paired)_contig_2638,jiechu1_no_rRNA.1_(paired)_contig_1648,	-	0.545992	0.614241
molecular_function	GO:0016853	isomerase activity	1	1	0	152	76	11360	jiechu1_no_rRNA.1_(paired)_contig_10875,	-	0.550601	0.615377
biological_process	GO:0015074	DNA integration	1	0	1	152	186	11360	-	jiechu1_no_rRNA.1_(paired)_contig_2754,	0.577824	0.64161
molecular_function	GO:0005215	transporter activity	1	1	0	152	184	11360	jiechu1_no_rRNA.1_(paired)_contig_3349,	-	0.588874	0.64966
molecular_function	GO:0003924	GTPase activity	2	2	0	152	148	11360	jiechu1_no_rRNA.1_(paired)_contig_2638,jiechu1_no_rRNA.1_(paired)_contig_1648,	-	0.643231	0.70508
molecular_function	GO:0008234	cysteine-type peptidase activity	1	0	1	152	92	11360	-	jiechu1_no_rRNA.1_(paired)_contig_7455,	0.705521	0.768434
biological_process	GO:0006184	GTP catabolic process	2	2	0	152	160	11360	jiechu1_no_rRNA.1_(paired)_contig_2638,jiechu1_no_rRNA.1_(paired)_contig_1648,	-	0.729419	0.789435
molecular_function	GO:0016788	hydrolase activity, acting on ester bonds	1	1	0	152	96	11360	jiechu1_no_rRNA.1_(paired)_contig_196,	-	0.743449	0.799558
molecular_function	GO:0003743	translation initiation factor activity	1	0	1	152	97	11360	-	jiechu1_no_rRNA.1_(paired)_contig_20531,	0.752862	0.804621
biological_process	GO:0006413	translational initiation	1	0	1	152	98	11360	-	jiechu1_no_rRNA.1_(paired)_contig_20531,	0.762245	0.809589
biological_process	GO:0006511	ubiquitin-dependent protein catabolic process	1	1	0	152	102	11360	jiechu1_no_rRNA.1_(paired)_contig_12590,	-	0.799466	0.838703
molecular_function	GO:0046872	metal ion binding	16	10	6	152	1320	11360	jiechu1_no_rRNA.1_(paired)_contig_7087,jiechu1_no_rRNA.1_(paired)_contig_138,jiechu1_no_rRNA.1_(paired)_contig_1764,jiechu1_no_rRNA.1_(paired)_contig_305,jiechu1_no_rRNA.1_(paired)_contig_978,jiechu1_no_rRNA.1_(paired)_contig_188,jiechu1_no_rRNA.1_(paired)_contig_636,jiechu1_no_rRNA.1_(paired)_contig_2988,jiechu1_no_rRNA.1_(paired)_contig_4298,jiechu1_no_rRNA.1_(paired)_contig_2022,	jiechu1_no_rRNA.1_(paired)_contig_2065,jiechu1_no_rRNA.1_(paired)_contig_1493,jiechu1_no_rRNA.1_(paired)_contig_2261,jiechu1_no_rRNA.1_(paired)_contig_15624,jiechu1_no_rRNA.1_(paired)_contig_226,jiechu1_no_rRNA.1_(paired)_contig_14799,	0.810525	0.845121
molecular_function	GO:0043565	sequence-specific DNA binding	2	1	1	152	173	11360	jiechu1_no_rRNA.1_(paired)_contig_2988,	jiechu1_no_rRNA.1_(paired)_contig_6514,	0.821679	0.851558
molecular_function	GO:0003700	sequence-specific DNA binding transcription factor activity	3	2	1	152	246	11360	jiechu1_no_rRNA.1_(paired)_contig_978,jiechu1_no_rRNA.1_(paired)_contig_2988,	jiechu1_no_rRNA.1_(paired)_contig_6514,	0.840603	0.865922
biological_process	GO:0016311	dephosphorylation	1	0	1	152	117	11360	-	jiechu1_no_rRNA.1_(paired)_contig_13963,	0.933929	0.956299
biological_process	GO:0006355	regulation of transcription, DNA-templated	5	4	1	152	412	11360	jiechu1_no_rRNA.1_(paired)_contig_978,jiechu1_no_rRNA.1_(paired)_contig_3461,jiechu1_no_rRNA.1_(paired)_contig_2988,jiechu1_no_rRNA.1_(paired)_contig_4976,	jiechu1_no_rRNA.1_(paired)_contig_6514,	0.949888	0.96685
molecular_function	GO:0008270	zinc ion binding	12	11	1	152	957	11360	jiechu1_no_rRNA.1_(paired)_contig_5335,jiechu1_no_rRNA.1_(paired)_contig_7087,jiechu1_no_rRNA.1_(paired)_contig_138,jiechu1_no_rRNA.1_(paired)_contig_1764,jiechu1_no_rRNA.1_(paired)_contig_12590,jiechu1_no_rRNA.1_(paired)_contig_615,jiechu1_no_rRNA.1_(paired)_contig_188,jiechu1_no_rRNA.1_(paired)_contig_636,jiechu1_no_rRNA.1_(paired)_contig_2988,jiechu1_no_rRNA.1_(paired)_contig_4976,jiechu1_no_r…	jiechu1_no_rRNA.1_(paired)_contig_3245,	0.967635	0.979086
