# Supplementary material for: Comparative Transcriptome and iTRAQ Proteome Analyses Reveal the Mechanisms of Diapause in Aphidius gifuensis Ashmead (Hymenoptera: Aphidiidae)
Source: Front Physiol. 2018 Nov 30;9:1697. doi: 10.3389/fphys.2018.01697 (PMC6284037; doi:10.3389/fphys.2018.01697)
Supplement: Table S6 — UniProt annotation of transcript. [file Table_6.xls]

## Sheet: group2_VS_group1_KEGG_enrichmen
pathway_ID	PATHWAY_DES	diff_gene_in_this_pathway	UP_GENES	DOWN_GENES	diff_gene_in_all_pathway	all_gene_in_this_pathway	all_gene_in_all_pathway	all_gene_list	gene_UP_list	gene_DOWN_list	Pvalue	FDR
ko01100	Metabolic pathways	20	6	14	80	1852	7307	jiechu1_no_rRNA.1_(paired)_contig_2587,jiechu1_no_rRNA.1_(paired)_contig_599,jiechu1_no_rRNA.1_(paired)_contig_808,jiechu1_no_rRNA.1_(paired)_contig_17820,jiechu1_no_rRNA.1_(paired)_contig_37,jiechu1_no_rRNA.1_(paired)_contig_2851,jiechu1_no_rRNA.1_(paired)_contig_10741,jiechu1_no_rRNA.1_(paired)_contig_4292,jiechu1_no_rRNA.1_(paired)_contig_1991,jiechu1_no_rRNA.1_(paired)_contig_41476,jiechu1_no…	jiechu1_no_rRNA.1_(paired)_contig_2587,jiechu1_no_rRNA.1_(paired)_contig_599,jiechu1_no_rRNA.1_(paired)_contig_2150,jiechu1_no_rRNA.1_(paired)_contig_427,jiechu1_no_rRNA.1_(paired)_contig_363,jiechu1_no_rRNA.1_(paired)_contig_1167,	jiechu1_no_rRNA.1_(paired)_contig_808,jiechu1_no_rRNA.1_(paired)_contig_17820,jiechu1_no_rRNA.1_(paired)_contig_37,jiechu1_no_rRNA.1_(paired)_contig_2851,jiechu1_no_rRNA.1_(paired)_contig_10741,jiechu1_no_rRNA.1_(paired)_contig_4292,jiechu1_no_rRNA.1_(paired)_contig_1991,jiechu1_no_rRNA.1_(paired)_contig_41476,jiechu1_no_rRNA.1_(paired)_contig_7150,jiechu1_no_rRNA.1_(paired)_contig_10691,jiechu1_…	0.123365	0.2892
ko01110	Biosynthesis of secondary metabolites	12	6	6	80	928	7307	jiechu1_no_rRNA.1_(paired)_contig_4742,jiechu1_no_rRNA.1_(paired)_contig_808,jiechu1_no_rRNA.1_(paired)_contig_90,jiechu1_no_rRNA.1_(paired)_contig_3627,jiechu1_no_rRNA.1_(paired)_contig_4292,jiechu1_no_rRNA.1_(paired)_contig_8230,jiechu1_no_rRNA.1_(paired)_contig_26992,jiechu1_no_rRNA.1_(paired)_contig_2150,jiechu1_no_rRNA.1_(paired)_contig_2495,jiechu1_no_rRNA.1_(paired)_contig_1373,jiechu1_no_…	jiechu1_no_rRNA.1_(paired)_contig_4742,jiechu1_no_rRNA.1_(paired)_contig_90,jiechu1_no_rRNA.1_(paired)_contig_3627,jiechu1_no_rRNA.1_(paired)_contig_2150,jiechu1_no_rRNA.1_(paired)_contig_1373,jiechu1_no_rRNA.1_(paired)_contig_1167,	jiechu1_no_rRNA.1_(paired)_contig_808,jiechu1_no_rRNA.1_(paired)_contig_4292,jiechu1_no_rRNA.1_(paired)_contig_8230,jiechu1_no_rRNA.1_(paired)_contig_26992,jiechu1_no_rRNA.1_(paired)_contig_2495,jiechu1_no_rRNA.1_(paired)_contig_1779,	0.00109449	0.0173903
ko01130	Biosynthesis of antibiotics	11	5	6	80	353	7307	jiechu1_no_rRNA.1_(paired)_contig_4742,jiechu1_no_rRNA.1_(paired)_contig_599,jiechu1_no_rRNA.1_(paired)_contig_4292,jiechu1_no_rRNA.1_(paired)_contig_8230,jiechu1_no_rRNA.1_(paired)_contig_7150,jiechu1_no_rRNA.1_(paired)_contig_26992,jiechu1_no_rRNA.1_(paired)_contig_2150,jiechu1_no_rRNA.1_(paired)_contig_2495,jiechu1_no_rRNA.1_(paired)_contig_1373,jiechu1_no_rRNA.1_(paired)_contig_1779,jiechu1_n…	jiechu1_no_rRNA.1_(paired)_contig_4742,jiechu1_no_rRNA.1_(paired)_contig_599,jiechu1_no_rRNA.1_(paired)_contig_2150,jiechu1_no_rRNA.1_(paired)_contig_1373,jiechu1_no_rRNA.1_(paired)_contig_1167,	jiechu1_no_rRNA.1_(paired)_contig_4292,jiechu1_no_rRNA.1_(paired)_contig_8230,jiechu1_no_rRNA.1_(paired)_contig_7150,jiechu1_no_rRNA.1_(paired)_contig_26992,jiechu1_no_rRNA.1_(paired)_contig_2495,jiechu1_no_rRNA.1_(paired)_contig_1779,	0.00214631	0.027902
ko04915	Estrogen signaling pathway	7	7	0	80	238	7307	jiechu1_no_rRNA.1_(paired)_contig_36,jiechu1_no_rRNA.1_(paired)_contig_1185,First_Contig1,jiechu1_no_rRNA.1_(paired)_contig_90,jiechu1_no_rRNA.1_(paired)_contig_13,jiechu1_no_rRNA.1_(paired)_contig_569,jiechu1_no_rRNA.1_(paired)_contig_1209,	jiechu1_no_rRNA.1_(paired)_contig_36,jiechu1_no_rRNA.1_(paired)_contig_1185,First_Contig1,jiechu1_no_rRNA.1_(paired)_contig_90,jiechu1_no_rRNA.1_(paired)_contig_13,jiechu1_no_rRNA.1_(paired)_contig_569,jiechu1_no_rRNA.1_(paired)_contig_1209,	-	0.0134422	0.0200931
ko00983	Drug metabolism - other enzymes	6	1	5	80	83	7307	jiechu1_no_rRNA.1_(paired)_contig_2587,jiechu1_no_rRNA.1_(paired)_contig_17820,jiechu1_no_rRNA.1_(paired)_contig_37,jiechu1_no_rRNA.1_(paired)_contig_2851,jiechu1_no_rRNA.1_(paired)_contig_13710,jiechu1_no_rRNA.1_(paired)_contig_9734,	jiechu1_no_rRNA.1_(paired)_contig_2587,	jiechu1_no_rRNA.1_(paired)_contig_17820,jiechu1_no_rRNA.1_(paired)_contig_37,jiechu1_no_rRNA.1_(paired)_contig_2851,jiechu1_no_rRNA.1_(paired)_contig_13710,jiechu1_no_rRNA.1_(paired)_contig_9734,	0.000120183	0.0057287
ko04261	Adrenergic signaling in cardiomyocytes	6	6	0	80	136	7307	jiechu1_no_rRNA.1_(paired)_contig_127,jiechu1_no_rRNA.1_(paired)_contig_1185,jiechu1_no_rRNA.1_(paired)_contig_198,jiechu1_no_rRNA.1_(paired)_contig_126,jiechu1_no_rRNA.1_(paired)_contig_1160,jiechu1_no_rRNA.1_(paired)_contig_31534,	jiechu1_no_rRNA.1_(paired)_contig_127,jiechu1_no_rRNA.1_(paired)_contig_1185,jiechu1_no_rRNA.1_(paired)_contig_198,jiechu1_no_rRNA.1_(paired)_contig_126,jiechu1_no_rRNA.1_(paired)_contig_1160,jiechu1_no_rRNA.1_(paired)_contig_31534,	-	0.00222046	0.0264605
ko05164	Influenza A	6	4	2	80	177	7307	jiechu1_no_rRNA.1_(paired)_contig_2463,First_Contig1,jiechu1_no_rRNA.1_(paired)_contig_13,jiechu1_no_rRNA.1_(paired)_contig_21562,jiechu1_no_rRNA.1_(paired)_contig_24660,jiechu1_no_rRNA.1_(paired)_contig_173,	jiechu1_no_rRNA.1_(paired)_contig_2463,First_Contig1,jiechu1_no_rRNA.1_(paired)_contig_13,jiechu1_no_rRNA.1_(paired)_contig_173,	jiechu1_no_rRNA.1_(paired)_contig_21562,jiechu1_no_rRNA.1_(paired)_contig_24660,	0.00930558	0.0700367
ko01200	Carbon metabolism	6	4	2	80	191	7307	jiechu1_no_rRNA.1_(paired)_contig_4742,jiechu1_no_rRNA.1_(paired)_contig_7150,jiechu1_no_rRNA.1_(paired)_contig_26992,jiechu1_no_rRNA.1_(paired)_contig_2150,jiechu1_no_rRNA.1_(paired)_contig_1373,jiechu1_no_rRNA.1_(paired)_contig_1167,	jiechu1_no_rRNA.1_(paired)_contig_4742,jiechu1_no_rRNA.1_(paired)_contig_2150,jiechu1_no_rRNA.1_(paired)_contig_1373,jiechu1_no_rRNA.1_(paired)_contig_1167,	jiechu1_no_rRNA.1_(paired)_contig_7150,jiechu1_no_rRNA.1_(paired)_contig_26992,	0.0137942	0.0789026
ko00260	Glycine, serine and threonine metabolism	6	2	4	80	221	7307	jiechu1_no_rRNA.1_(paired)_contig_21768,jiechu1_no_rRNA.1_(paired)_contig_28376,jiechu1_no_rRNA.1_(paired)_contig_7150,jiechu1_no_rRNA.1_(paired)_contig_4507,jiechu1_no_rRNA.1_(paired)_contig_48,jiechu1_no_rRNA.1_(paired)_contig_305,	jiechu1_no_rRNA.1_(paired)_contig_48,jiechu1_no_rRNA.1_(paired)_contig_305,	jiechu1_no_rRNA.1_(paired)_contig_21768,jiechu1_no_rRNA.1_(paired)_contig_28376,jiechu1_no_rRNA.1_(paired)_contig_7150,jiechu1_no_rRNA.1_(paired)_contig_4507,	0.0284852	0.110091
ko01120	Microbial metabolism in diverse environments	6	4	2	80	268	7307	jiechu1_no_rRNA.1_(paired)_contig_4742,jiechu1_no_rRNA.1_(paired)_contig_7150,jiechu1_no_rRNA.1_(paired)_contig_26992,jiechu1_no_rRNA.1_(paired)_contig_2150,jiechu1_no_rRNA.1_(paired)_contig_1373,jiechu1_no_rRNA.1_(paired)_contig_1167,	jiechu1_no_rRNA.1_(paired)_contig_4742,jiechu1_no_rRNA.1_(paired)_contig_2150,jiechu1_no_rRNA.1_(paired)_contig_1373,jiechu1_no_rRNA.1_(paired)_contig_1167,	jiechu1_no_rRNA.1_(paired)_contig_7150,jiechu1_no_rRNA.1_(paired)_contig_26992,	0.0695221	0.17753
ko04141	Protein processing in endoplasmic reticulum	6	6	0	80	276	7307	jiechu1_no_rRNA.1_(paired)_contig_458,jiechu1_no_rRNA.1_(paired)_contig_52,First_Contig1,jiechu1_no_rRNA.1_(paired)_contig_90,jiechu1_no_rRNA.1_(paired)_contig_318,jiechu1_no_rRNA.1_(paired)_contig_13,	jiechu1_no_rRNA.1_(paired)_contig_458,jiechu1_no_rRNA.1_(paired)_contig_52,First_Contig1,jiechu1_no_rRNA.1_(paired)_contig_90,jiechu1_no_rRNA.1_(paired)_contig_318,jiechu1_no_rRNA.1_(paired)_contig_13,	-	0.0790797	0.198393
ko00830	Retinol metabolism	5	3	2	80	56	7307	jiechu1_no_rRNA.1_(paired)_contig_2587,jiechu1_no_rRNA.1_(paired)_contig_17820,jiechu1_no_rRNA.1_(paired)_contig_1386,jiechu1_no_rRNA.1_(paired)_contig_4440,jiechu1_no_rRNA.1_(paired)_contig_9734,	jiechu1_no_rRNA.1_(paired)_contig_2587,jiechu1_no_rRNA.1_(paired)_contig_1386,jiechu1_no_rRNA.1_(paired)_contig_4440,	jiechu1_no_rRNA.1_(paired)_contig_17820,jiechu1_no_rRNA.1_(paired)_contig_9734,	0.000108169	0.0077341
ko04260	Cardiac muscle contraction	5	5	0	80	72	7307	jiechu1_no_rRNA.1_(paired)_contig_127,jiechu1_no_rRNA.1_(paired)_contig_198,jiechu1_no_rRNA.1_(paired)_contig_126,jiechu1_no_rRNA.1_(paired)_contig_1160,jiechu1_no_rRNA.1_(paired)_contig_31534,	jiechu1_no_rRNA.1_(paired)_contig_127,jiechu1_no_rRNA.1_(paired)_contig_198,jiechu1_no_rRNA.1_(paired)_contig_126,jiechu1_no_rRNA.1_(paired)_contig_1160,jiechu1_no_rRNA.1_(paired)_contig_31534,	-	0.000416485	0.0148894
ko00062	Fatty acid elongation	5	5	0	80	83	7307	jiechu1_no_rRNA.1_(paired)_contig_127,jiechu1_no_rRNA.1_(paired)_contig_3627,jiechu1_no_rRNA.1_(paired)_contig_126,jiechu1_no_rRNA.1_(paired)_contig_31534,jiechu1_no_rRNA.1_(paired)_contig_173,	jiechu1_no_rRNA.1_(paired)_contig_127,jiechu1_no_rRNA.1_(paired)_contig_3627,jiechu1_no_rRNA.1_(paired)_contig_126,jiechu1_no_rRNA.1_(paired)_contig_31534,jiechu1_no_rRNA.1_(paired)_contig_173,	-	0.000876216	0.0178999
ko01230	Biosynthesis of amino acids	5	3	2	80	114	7307	jiechu1_no_rRNA.1_(paired)_contig_4742,jiechu1_no_rRNA.1_(paired)_contig_7150,jiechu1_no_rRNA.1_(paired)_contig_2150,jiechu1_no_rRNA.1_(paired)_contig_2495,jiechu1_no_rRNA.1_(paired)_contig_1373,	jiechu1_no_rRNA.1_(paired)_contig_4742,jiechu1_no_rRNA.1_(paired)_contig_2150,jiechu1_no_rRNA.1_(paired)_contig_1373,	jiechu1_no_rRNA.1_(paired)_contig_7150,jiechu1_no_rRNA.1_(paired)_contig_2495,	0.00433351	0.0387308
ko04142	Lysosome	5	3	2	80	199	7307	jiechu1_no_rRNA.1_(paired)_contig_5495,jiechu1_no_rRNA.1_(paired)_contig_263,jiechu1_no_rRNA.1_(paired)_contig_10691,jiechu1_no_rRNA.1_(paired)_contig_5335,jiechu1_no_rRNA.1_(paired)_contig_4049,	jiechu1_no_rRNA.1_(paired)_contig_5495,jiechu1_no_rRNA.1_(paired)_contig_263,jiechu1_no_rRNA.1_(paired)_contig_5335,	jiechu1_no_rRNA.1_(paired)_contig_10691,jiechu1_no_rRNA.1_(paired)_contig_4049,	0.0540264	0.157669
ko04144	Endocytosis	5	4	1	80	689	7307	First_Contig1,jiechu1_no_rRNA.1_(paired)_contig_13,jiechu1_no_rRNA.1_(paired)_contig_41476,jiechu1_no_rRNA.1_(paired)_contig_305,jiechu1_no_rRNA.1_(paired)_contig_1167,	First_Contig1,jiechu1_no_rRNA.1_(paired)_contig_13,jiechu1_no_rRNA.1_(paired)_contig_305,jiechu1_no_rRNA.1_(paired)_contig_1167,	jiechu1_no_rRNA.1_(paired)_contig_41476,	0.478338	0.768565
ko00230	Purine metabolism	5	3	2	80	471	7307	jiechu1_no_rRNA.1_(paired)_contig_1185,jiechu1_no_rRNA.1_(paired)_contig_333,jiechu1_no_rRNA.1_(paired)_contig_41476,jiechu1_no_rRNA.1_(paired)_contig_1779,jiechu1_no_rRNA.1_(paired)_contig_1167,	jiechu1_no_rRNA.1_(paired)_contig_1185,jiechu1_no_rRNA.1_(paired)_contig_333,jiechu1_no_rRNA.1_(paired)_contig_1167,	jiechu1_no_rRNA.1_(paired)_contig_41476,jiechu1_no_rRNA.1_(paired)_contig_1779,	0.843082	0.949297
ko01210	2-Oxocarboxylic acid metabolism	4	3	1	80	34	7307	jiechu1_no_rRNA.1_(paired)_contig_4742,jiechu1_no_rRNA.1_(paired)_contig_2150,jiechu1_no_rRNA.1_(paired)_contig_2495,jiechu1_no_rRNA.1_(paired)_contig_1373,	jiechu1_no_rRNA.1_(paired)_contig_4742,jiechu1_no_rRNA.1_(paired)_contig_2150,jiechu1_no_rRNA.1_(paired)_contig_1373,	jiechu1_no_rRNA.1_(paired)_contig_2495,	0.000102751	0.0146934
ko00140	Steroid hormone biosynthesis	4	2	2	80	49	7307	jiechu1_no_rRNA.1_(paired)_contig_2587,jiechu1_no_rRNA.1_(paired)_contig_17820,jiechu1_no_rRNA.1_(paired)_contig_1386,jiechu1_no_rRNA.1_(paired)_contig_9734,	jiechu1_no_rRNA.1_(paired)_contig_2587,jiechu1_no_rRNA.1_(paired)_contig_1386,	jiechu1_no_rRNA.1_(paired)_contig_17820,jiechu1_no_rRNA.1_(paired)_contig_9734,	0.000552782	0.0158096
ko04612	Antigen processing and presentation	4	4	0	80	53	7307	jiechu1_no_rRNA.1_(paired)_contig_4427,First_Contig1,jiechu1_no_rRNA.1_(paired)_contig_90,jiechu1_no_rRNA.1_(paired)_contig_13,	jiechu1_no_rRNA.1_(paired)_contig_4427,First_Contig1,jiechu1_no_rRNA.1_(paired)_contig_90,jiechu1_no_rRNA.1_(paired)_contig_13,	-	0.000787532	0.0187695
ko00053	Ascorbate and aldarate metabolism	4	1	3	80	56	7307	jiechu1_no_rRNA.1_(paired)_contig_2587,jiechu1_no_rRNA.1_(paired)_contig_17820,jiechu1_no_rRNA.1_(paired)_contig_26992,jiechu1_no_rRNA.1_(paired)_contig_9734,	jiechu1_no_rRNA.1_(paired)_contig_2587,	jiechu1_no_rRNA.1_(paired)_contig_17820,jiechu1_no_rRNA.1_(paired)_contig_26992,jiechu1_no_rRNA.1_(paired)_contig_9734,	0.00100771	0.0180127
ko00040	Pentose and glucuronate interconversions	4	2	2	80	66	7307	jiechu1_no_rRNA.1_(paired)_contig_2587,jiechu1_no_rRNA.1_(paired)_contig_17820,jiechu1_no_rRNA.1_(paired)_contig_8047,jiechu1_no_rRNA.1_(paired)_contig_9734,	jiechu1_no_rRNA.1_(paired)_contig_2587,jiechu1_no_rRNA.1_(paired)_contig_8047,	jiechu1_no_rRNA.1_(paired)_contig_17820,jiechu1_no_rRNA.1_(paired)_contig_9734,	0.00208247	0.0297794
ko00020	Citrate cycle (TCA cycle)	4	4	0	80	67	7307	jiechu1_no_rRNA.1_(paired)_contig_4742,jiechu1_no_rRNA.1_(paired)_contig_2150,jiechu1_no_rRNA.1_(paired)_contig_1373,jiechu1_no_rRNA.1_(paired)_contig_1167,	jiechu1_no_rRNA.1_(paired)_contig_4742,jiechu1_no_rRNA.1_(paired)_contig_2150,jiechu1_no_rRNA.1_(paired)_contig_1373,jiechu1_no_rRNA.1_(paired)_contig_1167,	-	0.00222377	0.0244615
ko00052	Galactose metabolism	4	2	2	80	71	7307	jiechu1_no_rRNA.1_(paired)_contig_10741,jiechu1_no_rRNA.1_(paired)_contig_5495,jiechu1_no_rRNA.1_(paired)_contig_8047,jiechu1_no_rRNA.1_(paired)_contig_4323,	jiechu1_no_rRNA.1_(paired)_contig_5495,jiechu1_no_rRNA.1_(paired)_contig_8047,	jiechu1_no_rRNA.1_(paired)_contig_10741,jiechu1_no_rRNA.1_(paired)_contig_4323,	0.00286056	0.0292186
ko05204	Chemical carcinogenesis	4	2	2	80	74	7307	jiechu1_no_rRNA.1_(paired)_contig_2587,jiechu1_no_rRNA.1_(paired)_contig_17820,jiechu1_no_rRNA.1_(paired)_contig_1386,jiechu1_no_rRNA.1_(paired)_contig_9734,	jiechu1_no_rRNA.1_(paired)_contig_2587,jiechu1_no_rRNA.1_(paired)_contig_1386,	jiechu1_no_rRNA.1_(paired)_contig_17820,jiechu1_no_rRNA.1_(paired)_contig_9734,	0.00341917	0.0325961
ko05031	Amphetamine addiction	4	4	0	80	118	7307	jiechu1_no_rRNA.1_(paired)_contig_1185,jiechu1_no_rRNA.1_(paired)_contig_198,jiechu1_no_rRNA.1_(paired)_contig_1160,jiechu1_no_rRNA.1_(paired)_contig_173,	jiechu1_no_rRNA.1_(paired)_contig_1185,jiechu1_no_rRNA.1_(paired)_contig_198,jiechu1_no_rRNA.1_(paired)_contig_1160,jiechu1_no_rRNA.1_(paired)_contig_173,	-	0.0232929	0.100936
ko04530	Tight junction	4	4	0	80	128	7307	jiechu1_no_rRNA.1_(paired)_contig_127,jiechu1_no_rRNA.1_(paired)_contig_126,jiechu1_no_rRNA.1_(paired)_contig_31534,jiechu1_no_rRNA.1_(paired)_contig_173,	jiechu1_no_rRNA.1_(paired)_contig_127,jiechu1_no_rRNA.1_(paired)_contig_126,jiechu1_no_rRNA.1_(paired)_contig_31534,jiechu1_no_rRNA.1_(paired)_contig_173,	-	0.0318764	0.119956
ko00562	Inositol phosphate metabolism	4	3	1	80	333	7307	First_Contig1,jiechu1_no_rRNA.1_(paired)_contig_333,jiechu1_no_rRNA.1_(paired)_contig_13,jiechu1_no_rRNA.1_(paired)_contig_1991,	First_Contig1,jiechu1_no_rRNA.1_(paired)_contig_333,jiechu1_no_rRNA.1_(paired)_contig_13,	jiechu1_no_rRNA.1_(paired)_contig_1991,	0.624793	0.804914
ko05169	Epstein-Barr virus infection	4	3	1	80	435	7307	First_Contig1,jiechu1_no_rRNA.1_(paired)_contig_13,jiechu1_no_rRNA.1_(paired)_contig_41476,jiechu1_no_rRNA.1_(paired)_contig_1167,	First_Contig1,jiechu1_no_rRNA.1_(paired)_contig_13,jiechu1_no_rRNA.1_(paired)_contig_1167,	jiechu1_no_rRNA.1_(paired)_contig_41476,	0.953097	0.973521
ko04614	Renin-angiotensin system	3	3	0	80	56	7307	jiechu1_no_rRNA.1_(paired)_contig_6536,jiechu1_no_rRNA.1_(paired)_contig_18407,jiechu1_no_rRNA.1_(paired)_contig_6419,	jiechu1_no_rRNA.1_(paired)_contig_6536,jiechu1_no_rRNA.1_(paired)_contig_18407,jiechu1_no_rRNA.1_(paired)_contig_6419,	-	0.00796494	0.063277
ko00980	Metabolism of xenobiotics by cytochrome P450	3	1	2	80	59	7307	jiechu1_no_rRNA.1_(paired)_contig_2587,jiechu1_no_rRNA.1_(paired)_contig_17820,jiechu1_no_rRNA.1_(paired)_contig_9734,	jiechu1_no_rRNA.1_(paired)_contig_2587,	jiechu1_no_rRNA.1_(paired)_contig_17820,jiechu1_no_rRNA.1_(paired)_contig_9734,	0.00955156	0.0682936
ko00982	Drug metabolism - cytochrome P450	3	1	2	80	68	7307	jiechu1_no_rRNA.1_(paired)_contig_2587,jiechu1_no_rRNA.1_(paired)_contig_17820,jiechu1_no_rRNA.1_(paired)_contig_9734,	jiechu1_no_rRNA.1_(paired)_contig_2587,	jiechu1_no_rRNA.1_(paired)_contig_17820,jiechu1_no_rRNA.1_(paired)_contig_9734,	0.0155426	0.0854845
ko00531	Glycosaminoglycan degradation	3	1	2	80	75	7307	jiechu1_no_rRNA.1_(paired)_contig_5495,jiechu1_no_rRNA.1_(paired)_contig_10691,jiechu1_no_rRNA.1_(paired)_contig_4049,	jiechu1_no_rRNA.1_(paired)_contig_5495,	jiechu1_no_rRNA.1_(paired)_contig_10691,jiechu1_no_rRNA.1_(paired)_contig_4049,	0.0216021	0.10297
ko00860	Porphyrin and chlorophyll metabolism	3	1	2	80	76	7307	jiechu1_no_rRNA.1_(paired)_contig_2587,jiechu1_no_rRNA.1_(paired)_contig_17820,jiechu1_no_rRNA.1_(paired)_contig_9734,	jiechu1_no_rRNA.1_(paired)_contig_2587,	jiechu1_no_rRNA.1_(paired)_contig_17820,jiechu1_no_rRNA.1_(paired)_contig_9734,	0.0225748	0.104135
ko04974	Protein digestion and absorption	3	1	2	80	86	7307	jiechu1_no_rRNA.1_(paired)_contig_21562,jiechu1_no_rRNA.1_(paired)_contig_24660,jiechu1_no_rRNA.1_(paired)_contig_18407,	jiechu1_no_rRNA.1_(paired)_contig_18407,	jiechu1_no_rRNA.1_(paired)_contig_21562,jiechu1_no_rRNA.1_(paired)_contig_24660,	0.0338578	0.124145
ko00480	Glutathione metabolism	3	1	2	80	94	7307	jiechu1_no_rRNA.1_(paired)_contig_4292,jiechu1_no_rRNA.1_(paired)_contig_8230,jiechu1_no_rRNA.1_(paired)_contig_1819,	jiechu1_no_rRNA.1_(paired)_contig_1819,	jiechu1_no_rRNA.1_(paired)_contig_4292,jiechu1_no_rRNA.1_(paired)_contig_8230,	0.0450166	0.143053
ko00500	Starch and sucrose metabolism	3	1	2	80	94	7307	jiechu1_no_rRNA.1_(paired)_contig_2587,jiechu1_no_rRNA.1_(paired)_contig_17820,jiechu1_no_rRNA.1_(paired)_contig_9734,	jiechu1_no_rRNA.1_(paired)_contig_2587,	jiechu1_no_rRNA.1_(paired)_contig_17820,jiechu1_no_rRNA.1_(paired)_contig_9734,	0.0450166	0.157009
ko04920	Adipocytokine signaling pathway	3	3	0	80	115	7307	jiechu1_no_rRNA.1_(paired)_contig_198,jiechu1_no_rRNA.1_(paired)_contig_1160,jiechu1_no_rRNA.1_(paired)_contig_173,	jiechu1_no_rRNA.1_(paired)_contig_198,jiechu1_no_rRNA.1_(paired)_contig_1160,jiechu1_no_rRNA.1_(paired)_contig_173,	-	0.0838446	0.20672
ko04130	SNARE interactions in vesicular transport	3	3	0	80	131	7307	jiechu1_no_rRNA.1_(paired)_contig_2638,jiechu1_no_rRNA.1_(paired)_contig_1648,jiechu1_no_rRNA.1_(paired)_contig_173,	jiechu1_no_rRNA.1_(paired)_contig_2638,jiechu1_no_rRNA.1_(paired)_contig_1648,jiechu1_no_rRNA.1_(paired)_contig_173,	-	0.122844	0.292778
ko04145	Phagosome	3	3	0	80	134	7307	jiechu1_no_rRNA.1_(paired)_contig_2638,jiechu1_no_rRNA.1_(paired)_contig_1648,jiechu1_no_rRNA.1_(paired)_contig_173,	jiechu1_no_rRNA.1_(paired)_contig_2638,jiechu1_no_rRNA.1_(paired)_contig_1648,jiechu1_no_rRNA.1_(paired)_contig_173,	-	0.131046	0.297454
ko03018	RNA degradation	3	3	0	80	134	7307	jiechu1_no_rRNA.1_(paired)_contig_36,jiechu1_no_rRNA.1_(paired)_contig_569,jiechu1_no_rRNA.1_(paired)_contig_1209,	jiechu1_no_rRNA.1_(paired)_contig_36,jiechu1_no_rRNA.1_(paired)_contig_569,jiechu1_no_rRNA.1_(paired)_contig_1209,	-	0.131046	0.323097
ko04146	Peroxisome	3	3	0	80	138	7307	jiechu1_no_rRNA.1_(paired)_contig_4663,jiechu1_no_rRNA.1_(paired)_contig_9839,jiechu1_no_rRNA.1_(paired)_contig_305,	jiechu1_no_rRNA.1_(paired)_contig_4663,jiechu1_no_rRNA.1_(paired)_contig_9839,jiechu1_no_rRNA.1_(paired)_contig_305,	-	0.142409	0.308553
ko04921	Oxytocin signaling pathway	3	3	0	80	140	7307	jiechu1_no_rRNA.1_(paired)_contig_1185,jiechu1_no_rRNA.1_(paired)_contig_7921,jiechu1_no_rRNA.1_(paired)_contig_173,	jiechu1_no_rRNA.1_(paired)_contig_1185,jiechu1_no_rRNA.1_(paired)_contig_7921,jiechu1_no_rRNA.1_(paired)_contig_173,	-	0.148271	0.316458
ko04015	Rap1 signaling pathway	3	2	1	80	194	7307	jiechu1_no_rRNA.1_(paired)_contig_3908,jiechu1_no_rRNA.1_(paired)_contig_1185,jiechu1_no_rRNA.1_(paired)_contig_173,	jiechu1_no_rRNA.1_(paired)_contig_1185,jiechu1_no_rRNA.1_(paired)_contig_173,	jiechu1_no_rRNA.1_(paired)_contig_3908,	0.346265	0.618949
ko04510	Focal adhesion	3	2	1	80	218	7307	jiechu1_no_rRNA.1_(paired)_contig_3908,jiechu1_no_rRNA.1_(paired)_contig_7921,jiechu1_no_rRNA.1_(paired)_contig_173,	jiechu1_no_rRNA.1_(paired)_contig_7921,jiechu1_no_rRNA.1_(paired)_contig_173,	jiechu1_no_rRNA.1_(paired)_contig_3908,	0.453039	0.736189
ko04626	Plant-pathogen interaction	2	2	0	80	30	7307	jiechu1_no_rRNA.1_(paired)_contig_1185,jiechu1_no_rRNA.1_(paired)_contig_90,	jiechu1_no_rRNA.1_(paired)_contig_1185,jiechu1_no_rRNA.1_(paired)_contig_90,	-	0.00984544	0.0670427
ko00073	Cutin, suberine and wax biosynthesis	2	2	0	80	30	7307	jiechu1_no_rRNA.1_(paired)_contig_4663,jiechu1_no_rRNA.1_(paired)_contig_9839,	jiechu1_no_rRNA.1_(paired)_contig_4663,jiechu1_no_rRNA.1_(paired)_contig_9839,	-	0.00984544	0.0670427
ko00511	Other glycan degradation	2	2	0	80	39	7307	jiechu1_no_rRNA.1_(paired)_contig_5495,jiechu1_no_rRNA.1_(paired)_contig_5335,	jiechu1_no_rRNA.1_(paired)_contig_5495,jiechu1_no_rRNA.1_(paired)_contig_5335,	-	0.0200528	0.0988813
ko00590	Arachidonic acid metabolism	2	2	0	80	41	7307	jiechu1_no_rRNA.1_(paired)_contig_1819,jiechu1_no_rRNA.1_(paired)_contig_427,	jiechu1_no_rRNA.1_(paired)_contig_1819,jiechu1_no_rRNA.1_(paired)_contig_427,	-	0.0229115	0.102386
ko01040	Biosynthesis of unsaturated fatty acids	2	2	0	80	42	7307	jiechu1_no_rRNA.1_(paired)_contig_1143,jiechu1_no_rRNA.1_(paired)_contig_1006,	jiechu1_no_rRNA.1_(paired)_contig_1143,jiechu1_no_rRNA.1_(paired)_contig_1006,	-	0.0244239	0.102724
ko04973	Carbohydrate digestion and absorption	2	0	2	80	51	7307	jiechu1_no_rRNA.1_(paired)_contig_10741,jiechu1_no_rRNA.1_(paired)_contig_4323,	-	jiechu1_no_rRNA.1_(paired)_contig_10741,jiechu1_no_rRNA.1_(paired)_contig_4323,	0.0405674	0.141491
ko00330	Arginine and proline metabolism	2	0	2	80	59	7307	jiechu1_no_rRNA.1_(paired)_contig_4292,jiechu1_no_rRNA.1_(paired)_contig_8230,	-	jiechu1_no_rRNA.1_(paired)_contig_4292,jiechu1_no_rRNA.1_(paired)_contig_8230,	0.0587799	0.164814
ko04745	Phototransduction - fly	2	2	0	80	60	7307	jiechu1_no_rRNA.1_(paired)_contig_1185,jiechu1_no_rRNA.1_(paired)_contig_173,	jiechu1_no_rRNA.1_(paired)_contig_1185,jiechu1_no_rRNA.1_(paired)_contig_173,	-	0.0613112	0.165425
ko04971	Gastric acid secretion	2	2	0	80	76	7307	jiechu1_no_rRNA.1_(paired)_contig_1185,jiechu1_no_rRNA.1_(paired)_contig_7921,	jiechu1_no_rRNA.1_(paired)_contig_1185,jiechu1_no_rRNA.1_(paired)_contig_7921,	-	0.109272	0.264845
ko05134	Legionellosis	2	2	0	80	80	7307	First_Contig1,jiechu1_no_rRNA.1_(paired)_contig_13,	First_Contig1,jiechu1_no_rRNA.1_(paired)_contig_13,	-	0.965014	0.965014
ko04080	Neuroactive ligand-receptor interaction	2	0	2	80	92	7307	jiechu1_no_rRNA.1_(paired)_contig_21562,jiechu1_no_rRNA.1_(paired)_contig_24660,	-	jiechu1_no_rRNA.1_(paired)_contig_21562,jiechu1_no_rRNA.1_(paired)_contig_24660,	0.170263	0.352863
ko04540	Gap junction	2	2	0	80	99	7307	jiechu1_no_rRNA.1_(paired)_contig_2638,jiechu1_no_rRNA.1_(paired)_contig_1648,	jiechu1_no_rRNA.1_(paired)_contig_2638,jiechu1_no_rRNA.1_(paired)_contig_1648,	-	0.200563	0.409722
ko04270	Vascular smooth muscle contraction	2	2	0	80	119	7307	jiechu1_no_rRNA.1_(paired)_contig_1185,jiechu1_no_rRNA.1_(paired)_contig_7921,	jiechu1_no_rRNA.1_(paired)_contig_1185,jiechu1_no_rRNA.1_(paired)_contig_7921,	-	0.297173	0.574267
ko00564	Glycerophospholipid metabolism	2	1	1	80	122	7307	jiechu1_no_rRNA.1_(paired)_contig_3964,jiechu1_no_rRNA.1_(paired)_contig_665,	jiechu1_no_rRNA.1_(paired)_contig_665,	jiechu1_no_rRNA.1_(paired)_contig_3964,	0.312752	0.596314
ko04020	Calcium signaling pathway	2	2	0	80	124	7307	jiechu1_no_rRNA.1_(paired)_contig_1185,jiechu1_no_rRNA.1_(paired)_contig_7921,	jiechu1_no_rRNA.1_(paired)_contig_1185,jiechu1_no_rRNA.1_(paired)_contig_7921,	-	0.323272	0.592666
ko04722	Neurotrophin signaling pathway	2	1	1	80	125	7307	jiechu1_no_rRNA.1_(paired)_contig_3908,jiechu1_no_rRNA.1_(paired)_contig_1185,	jiechu1_no_rRNA.1_(paired)_contig_1185,	jiechu1_no_rRNA.1_(paired)_contig_3908,	0.328571	0.594754
ko04611	Platelet activation	2	2	0	80	131	7307	jiechu1_no_rRNA.1_(paired)_contig_7921,jiechu1_no_rRNA.1_(paired)_contig_173,	jiechu1_no_rRNA.1_(paired)_contig_7921,jiechu1_no_rRNA.1_(paired)_contig_173,	-	0.360867	0.629316
ko04972	Pancreatic secretion	2	0	2	80	131	7307	jiechu1_no_rRNA.1_(paired)_contig_21562,jiechu1_no_rRNA.1_(paired)_contig_24660,	-	jiechu1_no_rRNA.1_(paired)_contig_21562,jiechu1_no_rRNA.1_(paired)_contig_24660,	0.360867	0.688052
ko04070	Phosphatidylinositol signaling system	2	1	1	80	134	7307	jiechu1_no_rRNA.1_(paired)_contig_1185,jiechu1_no_rRNA.1_(paired)_contig_1991,	jiechu1_no_rRNA.1_(paired)_contig_1185,	jiechu1_no_rRNA.1_(paired)_contig_1991,	0.377314	0.642333
ko03320	PPAR signaling pathway	2	2	0	80	137	7307	jiechu1_no_rRNA.1_(paired)_contig_1143,jiechu1_no_rRNA.1_(paired)_contig_1006,	jiechu1_no_rRNA.1_(paired)_contig_1143,jiechu1_no_rRNA.1_(paired)_contig_1006,	-	0.393943	0.655044
ko04150	mTOR signaling pathway	2	2	0	80	155	7307	First_Contig1,jiechu1_no_rRNA.1_(paired)_contig_13,	First_Contig1,jiechu1_no_rRNA.1_(paired)_contig_13,	-	0.496721	0.75565
ko04022	cGMP-PKG signaling pathway	2	2	0	80	155	7307	jiechu1_no_rRNA.1_(paired)_contig_1185,jiechu1_no_rRNA.1_(paired)_contig_7921,	jiechu1_no_rRNA.1_(paired)_contig_1185,jiechu1_no_rRNA.1_(paired)_contig_7921,	-	0.496721	0.825943
ko01212	Fatty acid metabolism	2	2	0	80	158	7307	jiechu1_no_rRNA.1_(paired)_contig_1143,jiechu1_no_rRNA.1_(paired)_contig_1006,	jiechu1_no_rRNA.1_(paired)_contig_1143,jiechu1_no_rRNA.1_(paired)_contig_1006,	-	0.514228	0.750353
ko04925	Aldosterone synthesis and secretion	2	2	0	80	172	7307	jiechu1_no_rRNA.1_(paired)_contig_1185,jiechu1_no_rRNA.1_(paired)_contig_173,	jiechu1_no_rRNA.1_(paired)_contig_1185,jiechu1_no_rRNA.1_(paired)_contig_173,	-	0.596716	0.79748
ko00190	Oxidative phosphorylation	2	1	1	80	175	7307	jiechu1_no_rRNA.1_(paired)_contig_41476,jiechu1_no_rRNA.1_(paired)_contig_1167,	jiechu1_no_rRNA.1_(paired)_contig_1167,	jiechu1_no_rRNA.1_(paired)_contig_41476,	0.61449	0.806166
ko04932	Non-alcoholic fatty liver disease (NAFLD)	2	1	1	80	179	7307	jiechu1_no_rRNA.1_(paired)_contig_41476,jiechu1_no_rRNA.1_(paired)_contig_1167,	jiechu1_no_rRNA.1_(paired)_contig_1167,	jiechu1_no_rRNA.1_(paired)_contig_41476,	0.638203	0.800553
ko03040	Spliceosome	2	2	0	80	310	7307	First_Contig1,jiechu1_no_rRNA.1_(paired)_contig_13,	First_Contig1,jiechu1_no_rRNA.1_(paired)_contig_13,	-	0.676871	0.834419
ko00240	Pyrimidine metabolism	2	0	2	80	186	7307	jiechu1_no_rRNA.1_(paired)_contig_2851,jiechu1_no_rRNA.1_(paired)_contig_1779,	-	jiechu1_no_rRNA.1_(paired)_contig_2851,jiechu1_no_rRNA.1_(paired)_contig_1779,	0.679678	0.830717
ko04810	Regulation of actin cytoskeleton	2	2	0	80	192	7307	jiechu1_no_rRNA.1_(paired)_contig_7921,jiechu1_no_rRNA.1_(paired)_contig_173,	jiechu1_no_rRNA.1_(paired)_contig_7921,jiechu1_no_rRNA.1_(paired)_contig_173,	-	0.715126	0.852192
ko04152	AMPK signaling pathway	2	2	0	80	213	7307	jiechu1_no_rRNA.1_(paired)_contig_1143,jiechu1_no_rRNA.1_(paired)_contig_1006,	jiechu1_no_rRNA.1_(paired)_contig_1143,jiechu1_no_rRNA.1_(paired)_contig_1006,	-	0.837482	0.950476
ko04910	Insulin signaling pathway	2	1	1	80	217	7307	jiechu1_no_rRNA.1_(paired)_contig_3908,jiechu1_no_rRNA.1_(paired)_contig_1185,	jiechu1_no_rRNA.1_(paired)_contig_1185,	jiechu1_no_rRNA.1_(paired)_contig_3908,	0.860347	0.946382
ko04010	MAPK signaling pathway	2	2	0	80	226	7307	First_Contig1,jiechu1_no_rRNA.1_(paired)_contig_13,	First_Contig1,jiechu1_no_rRNA.1_(paired)_contig_13,	-	0.911125	0.951028
ko00290	Valine, leucine and isoleucine biosynthesis	1	0	1	80	3	7307	jiechu1_no_rRNA.1_(paired)_contig_2495,	-	jiechu1_no_rRNA.1_(paired)_contig_2495,	0.492525	0.765555
ko00940	Phenylpropanoid biosynthesis	1	0	1	80	8	7307	jiechu1_no_rRNA.1_(paired)_contig_808,	-	jiechu1_no_rRNA.1_(paired)_contig_808,	0.00749551	0.0630505
ko00750	Vitamin B6 metabolism	1	0	1	80	10	7307	jiechu1_no_rRNA.1_(paired)_contig_7150,	-	jiechu1_no_rRNA.1_(paired)_contig_7150,	0.0115374	0.0717322
ko01220	Degradation of aromatic compounds	1	0	1	80	13	7307	jiechu1_no_rRNA.1_(paired)_contig_26992,	-	jiechu1_no_rRNA.1_(paired)_contig_26992,	0.0190654	0.100976
ko04744	Phototransduction	1	1	0	80	13	7307	jiechu1_no_rRNA.1_(paired)_contig_1185,	jiechu1_no_rRNA.1_(paired)_contig_1185,	-	0.0190654	0.10486
ko00460	Cyanoamino acid metabolism	1	1	0	80	15	7307	jiechu1_no_rRNA.1_(paired)_contig_1819,	jiechu1_no_rRNA.1_(paired)_contig_1819,	-	0.025007	0.102171
ko00930	Caprolactam degradation	1	0	1	80	16	7307	jiechu1_no_rRNA.1_(paired)_contig_26992,	-	jiechu1_no_rRNA.1_(paired)_contig_26992,	0.0282413	0.112181
ko00521	Streptomycin biosynthesis	1	0	1	80	18	7307	jiechu1_no_rRNA.1_(paired)_contig_1991,	-	jiechu1_no_rRNA.1_(paired)_contig_1991,	0.0352152	0.125894
ko00100	Steroid biosynthesis	1	1	0	80	20	7307	jiechu1_no_rRNA.1_(paired)_contig_599,	jiechu1_no_rRNA.1_(paired)_contig_599,	-	0.0428351	0.145843
ko00130	Ubiquinone and other terpenoid-quinone biosynthesis	1	0	1	80	20	7307	jiechu1_no_rRNA.1_(paired)_contig_808,	-	jiechu1_no_rRNA.1_(paired)_contig_808,	0.0428351	0.153135
ko00604	Glycosphingolipid biosynthesis - ganglio series	1	1	0	80	20	7307	jiechu1_no_rRNA.1_(paired)_contig_5495,	jiechu1_no_rRNA.1_(paired)_contig_5495,	-	0.0428351	0.153135
ko00430	Taurine and hypotaurine metabolism	1	1	0	80	21	7307	jiechu1_no_rRNA.1_(paired)_contig_1819,	jiechu1_no_rRNA.1_(paired)_contig_1819,	-	0.0468771	0.142626
ko00360	Phenylalanine metabolism	1	0	1	80	22	7307	jiechu1_no_rRNA.1_(paired)_contig_808,	-	jiechu1_no_rRNA.1_(paired)_contig_808,	0.0510686	0.152142
ko00591	Linoleic acid metabolism	1	1	0	80	23	7307	jiechu1_no_rRNA.1_(paired)_contig_1386,	jiechu1_no_rRNA.1_(paired)_contig_1386,	-	0.0554056	0.15846
ko00770	Pantothenate and CoA biosynthesis	1	0	1	80	24	7307	jiechu1_no_rRNA.1_(paired)_contig_2495,	-	jiechu1_no_rRNA.1_(paired)_contig_2495,	0.0598844	0.164682
ko00603	Glycosphingolipid biosynthesis - globo series	1	1	0	80	25	7307	jiechu1_no_rRNA.1_(paired)_contig_263,	jiechu1_no_rRNA.1_(paired)_contig_263,	-	0.0645012	0.170809
ko00790	Folate biosynthesis	1	1	0	80	26	7307	jiechu1_no_rRNA.1_(paired)_contig_168,	jiechu1_no_rRNA.1_(paired)_contig_168,	-	0.0692524	0.180056
ko00563	Glycosylphosphatidylinositol(GPI)-anchor biosynthesis	1	0	1	80	37	7307	jiechu1_no_rRNA.1_(paired)_contig_185,	-	jiechu1_no_rRNA.1_(paired)_contig_185,	0.129398	0.29845
ko04621	NOD-like receptor signaling pathway	1	1	0	80	39	7307	jiechu1_no_rRNA.1_(paired)_contig_90,	jiechu1_no_rRNA.1_(paired)_contig_90,	-	0.141691	0.31172
ko05133	Pertussis	1	1	0	80	41	7307	jiechu1_no_rRNA.1_(paired)_contig_1185,	jiechu1_no_rRNA.1_(paired)_contig_1185,	-	0.154342	0.324572
ko04740	Olfactory transduction	1	1	0	80	48	7307	jiechu1_no_rRNA.1_(paired)_contig_1185,	jiechu1_no_rRNA.1_(paired)_contig_1185,	-	0.201128	0.405088
ko04011	MAPK signaling pathway - yeast	1	1	0	80	51	7307	jiechu1_no_rRNA.1_(paired)_contig_305,	jiechu1_no_rRNA.1_(paired)_contig_305,	-	0.222221	0.441356
ko00600	Sphingolipid metabolism	1	1	0	80	52	7307	jiechu1_no_rRNA.1_(paired)_contig_5495,	jiechu1_no_rRNA.1_(paired)_contig_5495,	-	0.229374	0.449322
ko04924	Renin secretion	1	1	0	80	64	7307	jiechu1_no_rRNA.1_(paired)_contig_1185,	jiechu1_no_rRNA.1_(paired)_contig_1185,	-	0.319074	0.600362
ko00680	Methane metabolism	1	0	1	80	64	7307	jiechu1_no_rRNA.1_(paired)_contig_7150,	-	jiechu1_no_rRNA.1_(paired)_contig_7150,	0.319074	0.651822
ko00270	Cysteine and methionine metabolism	1	0	1	80	68	7307	jiechu1_no_rRNA.1_(paired)_contig_2495,	-	jiechu1_no_rRNA.1_(paired)_contig_2495,	0.35021	0.618272
ko00051	Fructose and mannose metabolism	1	1	0	80	72	7307	jiechu1_no_rRNA.1_(paired)_contig_8047,	jiechu1_no_rRNA.1_(paired)_contig_8047,	-	0.38178	0.642289
ko00561	Glycerolipid metabolism	1	1	0	80	79	7307	jiechu1_no_rRNA.1_(paired)_contig_8047,	jiechu1_no_rRNA.1_(paired)_contig_8047,	-	0.437782	0.719573
ko05132	Salmonella infection	1	1	0	80	85	7307	jiechu1_no_rRNA.1_(paired)_contig_173,	jiechu1_no_rRNA.1_(paired)_contig_173,	-	0.48625	0.772598
ko05205	Proteoglycans in cancer	1	1	0	80	248	7307	jiechu1_no_rRNA.1_(paired)_contig_173,	jiechu1_no_rRNA.1_(paired)_contig_173,	-	0.490068	0.770107
ko00280	Valine, leucine and isoleucine degradation	1	0	1	80	86	7307	jiechu1_no_rRNA.1_(paired)_contig_2495,	-	jiechu1_no_rRNA.1_(paired)_contig_2495,	0.49435	0.76013
ko00030	Pentose phosphate pathway	1	0	1	80	87	7307	jiechu1_no_rRNA.1_(paired)_contig_26992,	-	jiechu1_no_rRNA.1_(paired)_contig_26992,	0.502453	0.748446
ko04720	Long-term potentiation	1	1	0	80	88	7307	jiechu1_no_rRNA.1_(paired)_contig_1185,	jiechu1_no_rRNA.1_(paired)_contig_1185,	-	0.510559	0.752679
ko04151	PI3K-Akt signaling pathway	1	1	0	80	240	7307	jiechu1_no_rRNA.1_(paired)_contig_90,	jiechu1_no_rRNA.1_(paired)_contig_90,	-	0.521862	0.753801
ko03022	Basal transcription factors	1	0	1	80	90	7307	jiechu1_no_rRNA.1_(paired)_contig_20531,	-	jiechu1_no_rRNA.1_(paired)_contig_20531,	0.526772	0.753284
ko04713	Circadian entrainment	1	1	0	80	92	7307	jiechu1_no_rRNA.1_(paired)_contig_1185,	jiechu1_no_rRNA.1_(paired)_contig_1185,	-	0.542981	0.768775
ko04725	Cholinergic synapse	1	0	1	80	92	7307	jiechu1_no_rRNA.1_(paired)_contig_3964,	-	jiechu1_no_rRNA.1_(paired)_contig_3964,	0.542981	0.843982
ko04917	Prolactin signaling pathway	1	1	0	80	94	7307	jiechu1_no_rRNA.1_(paired)_contig_1185,	jiechu1_no_rRNA.1_(paired)_contig_1185,	-	0.559179	0.776337
ko05034	Alcoholism	1	1	0	80	94	7307	jiechu1_no_rRNA.1_(paired)_contig_1185,	jiechu1_no_rRNA.1_(paired)_contig_1185,	-	0.559179	0.859814
ko04970	Salivary secretion	1	1	0	80	96	7307	jiechu1_no_rRNA.1_(paired)_contig_1185,	jiechu1_no_rRNA.1_(paired)_contig_1185,	-	0.575359	0.783584
ko04024	cAMP signaling pathway	1	1	0	80	224	7307	jiechu1_no_rRNA.1_(paired)_contig_1185,	jiechu1_no_rRNA.1_(paired)_contig_1185,	-	0.590869	0.797115
ko04914	Progesterone-mediated oocyte maturation	1	1	0	80	100	7307	jiechu1_no_rRNA.1_(paired)_contig_90,	jiechu1_no_rRNA.1_(paired)_contig_90,	-	0.607635	0.804553
ko00310	Lysine degradation	1	0	1	80	218	7307	jiechu1_no_rRNA.1_(paired)_contig_3908,	-	jiechu1_no_rRNA.1_(paired)_contig_3908,	0.618688	0.804295
ko04912	GnRH signaling pathway	1	1	0	80	103	7307	jiechu1_no_rRNA.1_(paired)_contig_1185,	jiechu1_no_rRNA.1_(paired)_contig_1185,	-	0.631742	0.8066
ko04120	Ubiquitin mediated proteolysis	1	1	0	80	215	7307	jiechu1_no_rRNA.1_(paired)_contig_53,	jiechu1_no_rRNA.1_(paired)_contig_53,	-	0.633008	0.801063
ko04350	TGF-beta signaling pathway	1	1	0	80	108	7307	jiechu1_no_rRNA.1_(paired)_contig_4013,	jiechu1_no_rRNA.1_(paired)_contig_4013,	-	0.671673	0.835211
ko00510	N-Glycan biosynthesis	1	1	0	80	202	7307	jiechu1_no_rRNA.1_(paired)_contig_173,	jiechu1_no_rRNA.1_(paired)_contig_173,	-	0.69829	0.846233
ko04728	Dopaminergic synapse	1	1	0	80	112	7307	jiechu1_no_rRNA.1_(paired)_contig_1185,	jiechu1_no_rRNA.1_(paired)_contig_1185,	-	0.703346	0.845197
ko04916	Melanogenesis	1	1	0	80	116	7307	jiechu1_no_rRNA.1_(paired)_contig_1185,	jiechu1_no_rRNA.1_(paired)_contig_1185,	-	0.734733	0.868321
ko04919	Thyroid hormone signaling pathway	1	1	0	80	188	7307	jiechu1_no_rRNA.1_(paired)_contig_173,	jiechu1_no_rRNA.1_(paired)_contig_173,	-	0.774621	0.907957
ko05231	Choline metabolism in cancer	1	1	0	80	185	7307	jiechu1_no_rRNA.1_(paired)_contig_90,	jiechu1_no_rRNA.1_(paired)_contig_90,	-	0.791806	0.920555
ko04014	Ras signaling pathway	1	1	0	80	184	7307	jiechu1_no_rRNA.1_(paired)_contig_1185,	jiechu1_no_rRNA.1_(paired)_contig_1185,	-	0.7976	0.919813
ko04360	Axon guidance	1	1	0	80	127	7307	jiechu1_no_rRNA.1_(paired)_contig_138,	jiechu1_no_rRNA.1_(paired)_contig_138,	-	0.819309	0.937289
ko04520	Adherens junction	1	1	0	80	131	7307	jiechu1_no_rRNA.1_(paired)_contig_173,	jiechu1_no_rRNA.1_(paired)_contig_173,	-	0.849346	0.948879
ko04391	Hippo signaling pathway - fly	1	1	0	80	132	7307	jiechu1_no_rRNA.1_(paired)_contig_173,	jiechu1_no_rRNA.1_(paired)_contig_173,	-	0.856791	0.949776
ko05206	MicroRNAs in cancer	1	1	0	80	172	7307	jiechu1_no_rRNA.1_(paired)_contig_198,	jiechu1_no_rRNA.1_(paired)_contig_198,	-	0.869691	0.949357
ko03008	Ribosome biogenesis in eukaryotes	1	0	1	80	168	7307	First_Contig871,	-	First_Contig871,	0.894771	0.969335
ko04390	Hippo signaling pathway	1	1	0	80	166	7307	jiechu1_no_rRNA.1_(paired)_contig_173,	jiechu1_no_rRNA.1_(paired)_contig_173,	-	0.907507	0.975741
ko04670	Leukocyte transendothelial migration	1	1	0	80	139	7307	jiechu1_no_rRNA.1_(paired)_contig_173,	jiechu1_no_rRNA.1_(paired)_contig_173,	-	0.90814	0.969135
ko04922	Glucagon signaling pathway	1	1	0	80	139	7307	jiechu1_no_rRNA.1_(paired)_contig_1185,	jiechu1_no_rRNA.1_(paired)_contig_1185,	-	0.90814	1.05581
ko04750	Inflammatory mediator regulation of TRP channels	1	1	0	80	139	7307	jiechu1_no_rRNA.1_(paired)_contig_1185,	jiechu1_no_rRNA.1_(paired)_contig_1185,	-	0.90814	1.05581
ko05202	Transcriptional misregulation in cancer	1	1	0	80	161	7307	jiechu1_no_rRNA.1_(paired)_contig_2463,	jiechu1_no_rRNA.1_(paired)_contig_2463,	-	0.939916	0.97397
ko03030	DNA replication	1	1	0	80	160	7307	jiechu1_no_rRNA.1_(paired)_contig_173,	jiechu1_no_rRNA.1_(paired)_contig_173,	-	0.946494	0.973731
ko00520	Amino sugar and nucleotide sugar metabolism	1	1	0	80	159	7307	jiechu1_no_rRNA.1_(paired)_contig_363,	jiechu1_no_rRNA.1_(paired)_contig_363,	-	0.953105	0.966624
ko04114	Oocyte meiosis	1	1	0	80	146	7307	jiechu1_no_rRNA.1_(paired)_contig_1185,	jiechu1_no_rRNA.1_(paired)_contig_1185,	-	0.95809	0.964837
